# Supplementary material for: Integrative analysis of reference epigenomes in 20 rice varieties
Source: PubMed Central journal article supplement (PMC7253419; doi:10.1038/s41467-020-16457-5), 2020-05-27
Supplement: 41467_2020_16457_MOESM1_ESM.pdf [file 41467_2020_16457_MOESM1_ESM.pdf]

# **Integrative analysis of reference epigenomes in 20 rice varieties**

*Zhao et al.*

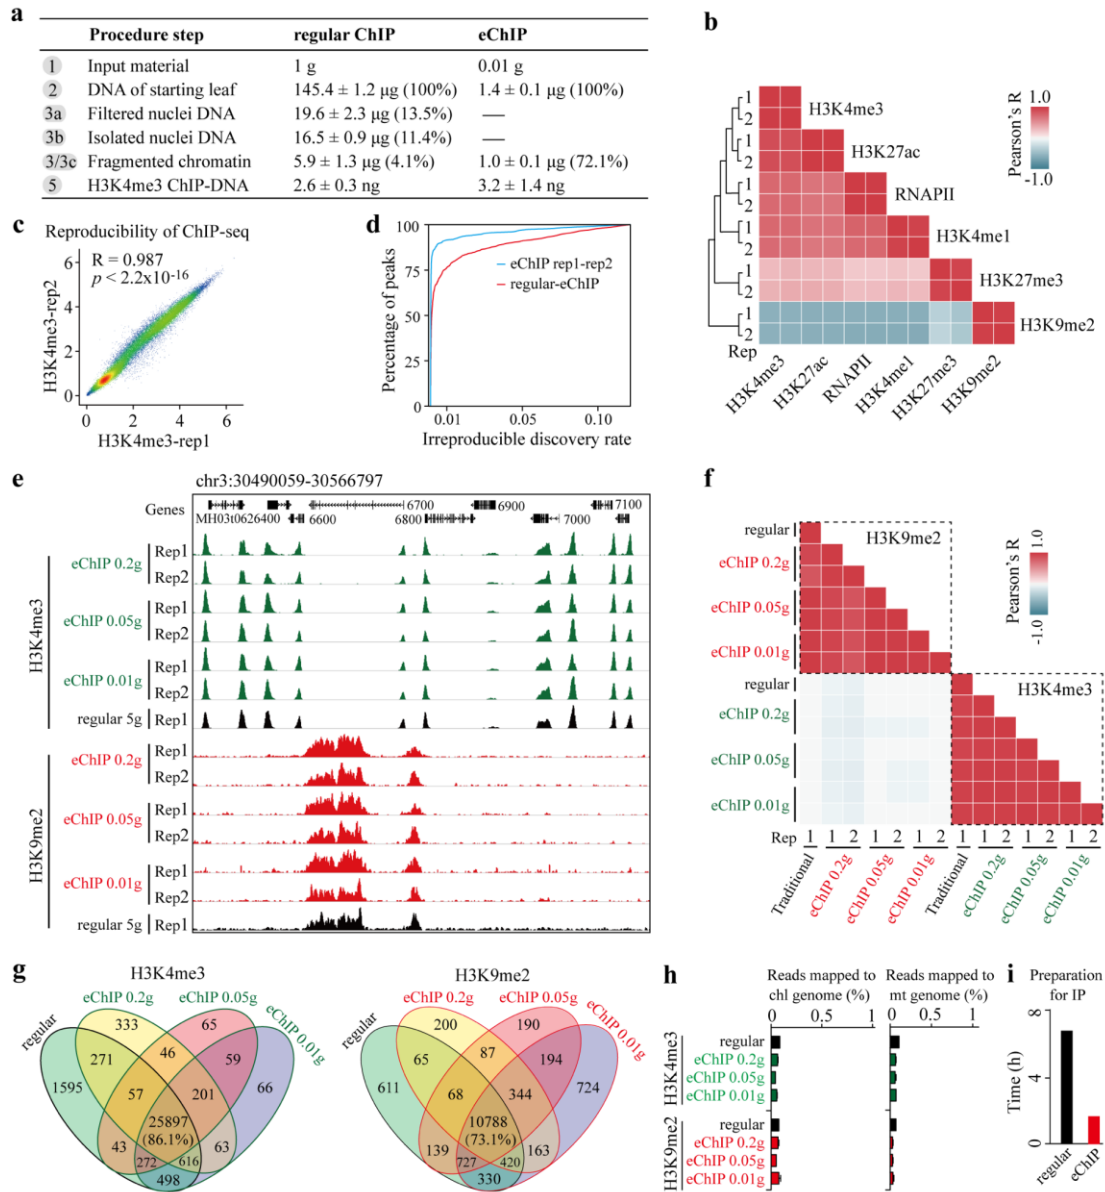

**Supplementary Fig. 1. eChIP as a fast and robust method for low-input samples in rice.**

**a**, Comparison of chromatin extraction efficiency in different steps of regular ChIP and eChIP in Fig. 1a. The protein-DNA complexes were reverse-cross-linked, and the purified DNA was used to evaluate chromatin content in different steps. Relative chromatin extraction efficiency at the different steps was normalized to the amount of the starting material. Each value represents the mean ± standard error of mean ( $n = 3$  biological replicates). **b**, Genome-wide correlation heat map (with bin size 1,000 bp) for eChIP-Seq data of two biological replicates across different histone marks and different sample amounts. **c**, Pearson correlation for two replicates of H3K4me3 eChIP-Seq. Numbers of the mapped reads from each genomic bin (10 kb) were plotted in log scale between two replicates. The  $R$  value calculated by Pearson correlation coefficient at 10 kb

genomic bin is shown. p-values were calculated by comparing a fitted model to a null model using the ‘anova’ function;  $p < 2.2 \times 10^{-16}$ . **d**, Irreproducible discovery rate analysis for eChIP-Seq and regular ChIP-Seq of H3K4me3. **e**, Genome browser screenshot showing regular ChIP (5 g input material) and eChIP (0.01–0.2 g input material) datasets from young leaves of rice. **f**, Genome-wide Pearson correlation heat map (with 1-kb bin size) between H3K4me3 and H3K9me2 with regular ChIP and eChIP data for different sample amounts. **g**, Reproducibility of peaks called by regular ChIP and eChIP. Venn diagrams display a high percentage of overlap between peaks called by the indicated methods generated from different sample amounts. **h**, Comparison of the percentages of reads mapped to chloroplast (Chl) or mitochondrion (mt) genome from the regular ChIP and eChIP. **i**, Comparison of IP preparation time for regular ChIP and eChIP.

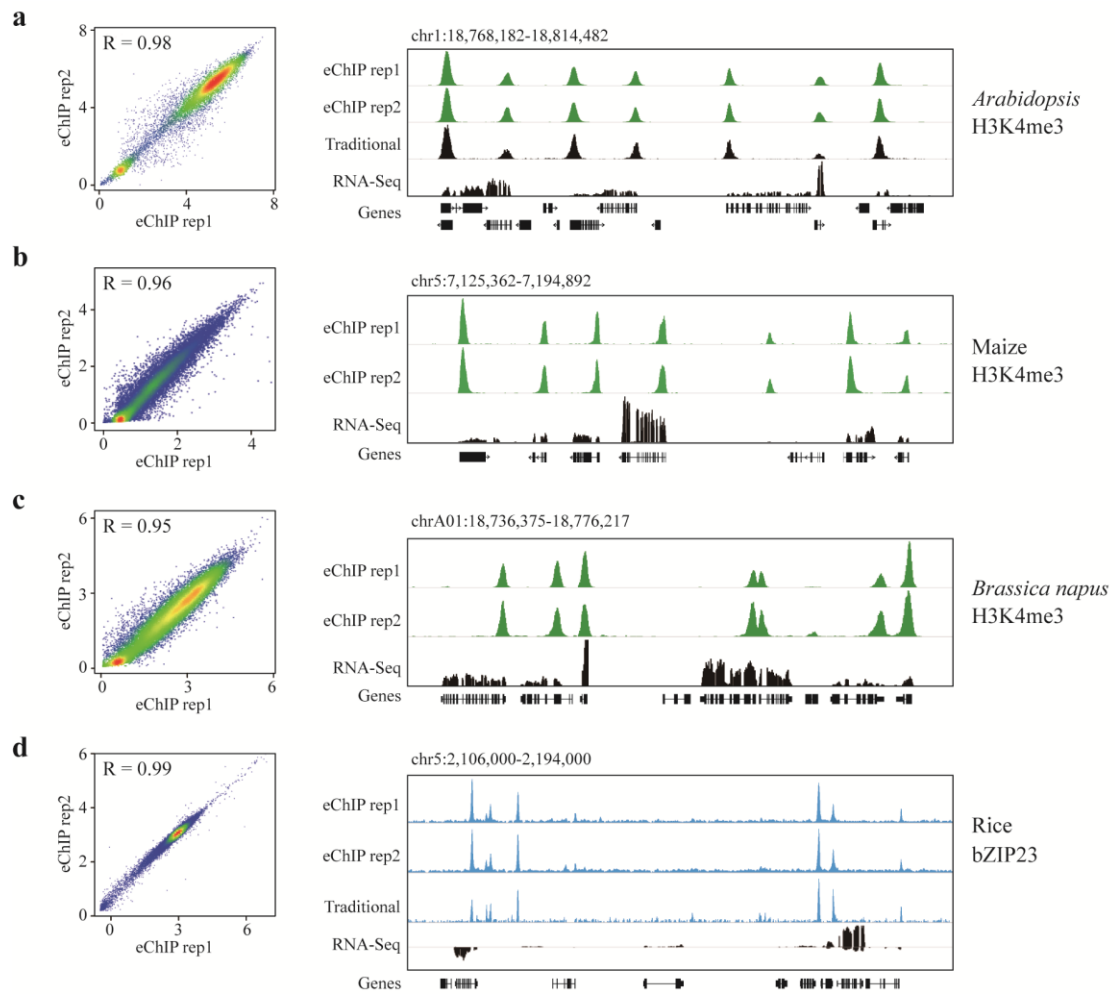

**Supplementary Fig. 2. eChIP works for modified histones and transcription factor in the indicated plant species.**

**a–d**, Pearson correlation for two replicates of H3K4me3 eChIP-Seq data from young leaves of *Arabidopsis* (**a**), Maize (**b**), *Brassica napus* (**c**), and transcription factor (bZIP23) eChIP-Seq data from young leaves of rice (**d**). Representative genome browser screenshots for ChIP-Seq data were also shown.

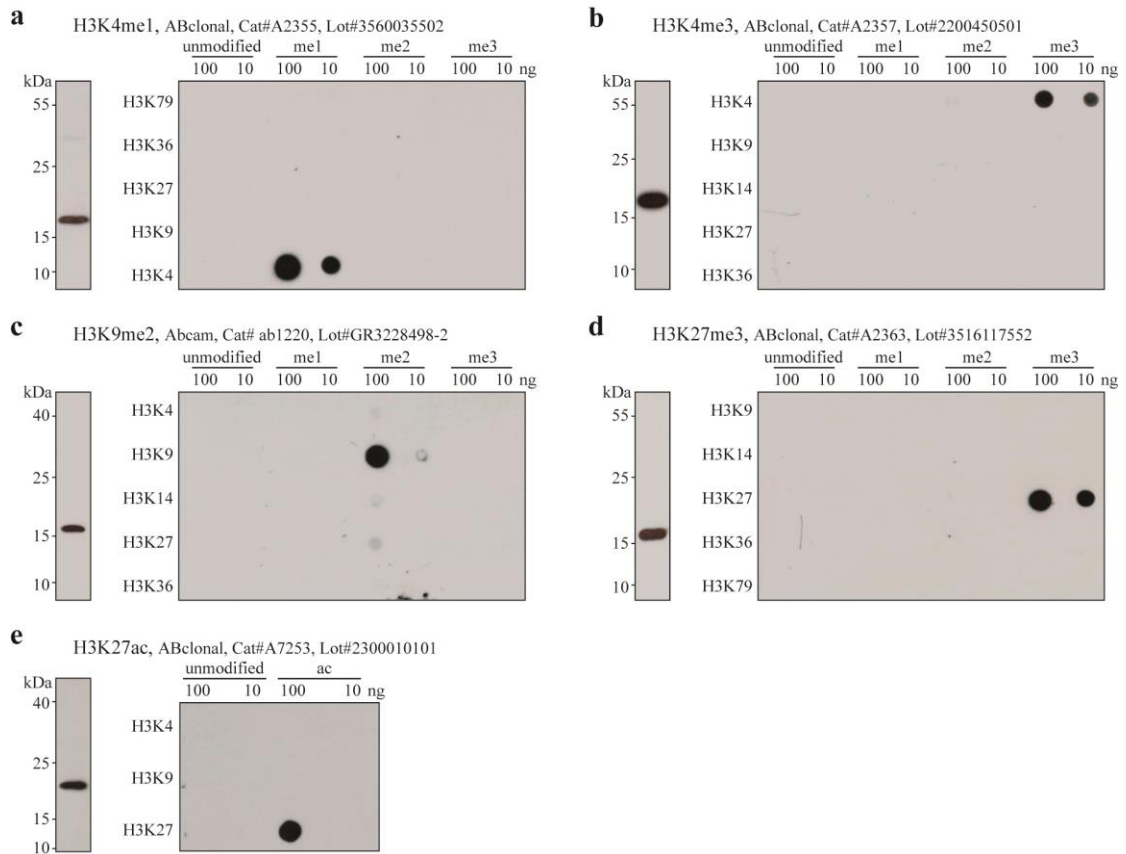

**Supplementary Fig. 3. Antibody specificity validation.**

**a–e**, Western blots of the indicated histone modification antibodies recognizes a ~17 kDa protein in rice protein lysate (left panel). Dot blots confirmed specificity of modified histones (right panel). The experiments were repeated two times with similar results. Source data are provided as a Source Data file.

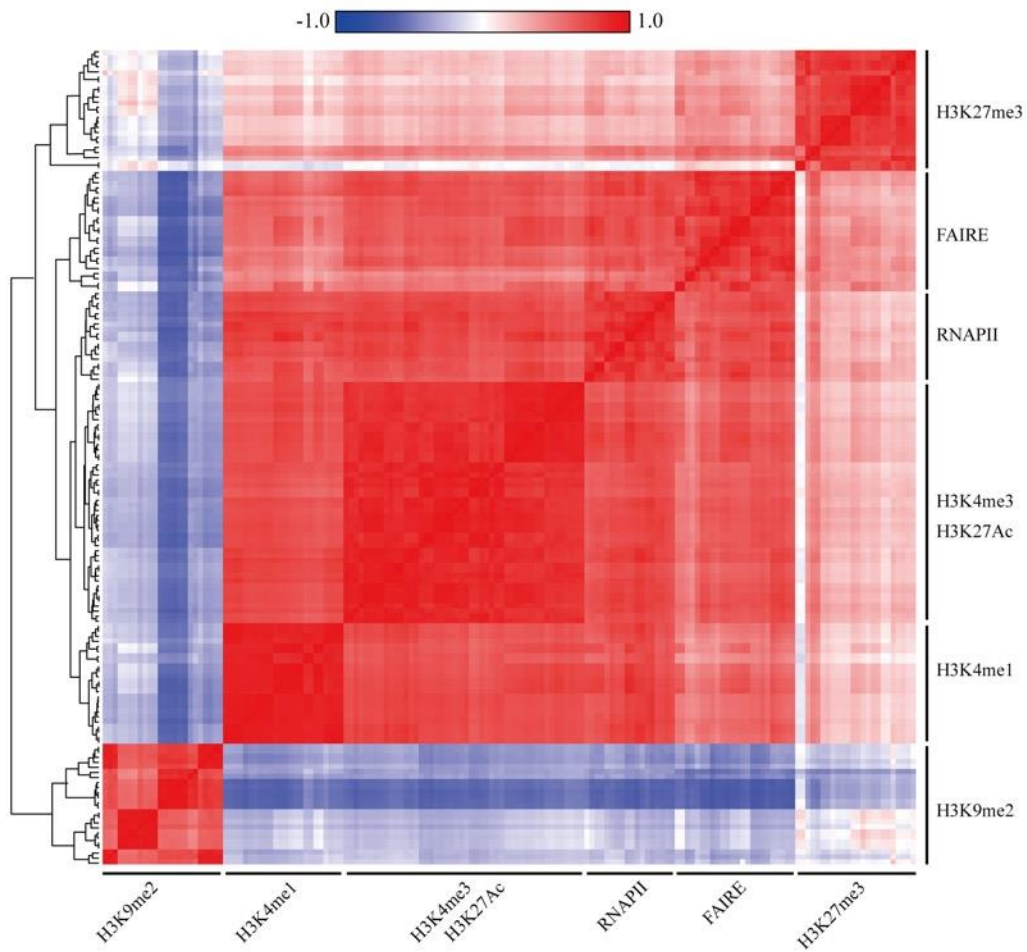

**Supplementary Fig. 4. Correlation analysis for epigenomic datasets in rice.**

Genome-wide correlation heatmap (with 10-kb bin size) for eChIP-Seq and FAIRE-Seq datasets across different rice tissues and varieties (MH63, ZS97, and Nip) used in this study. Source Data are provided as a Source Data file.

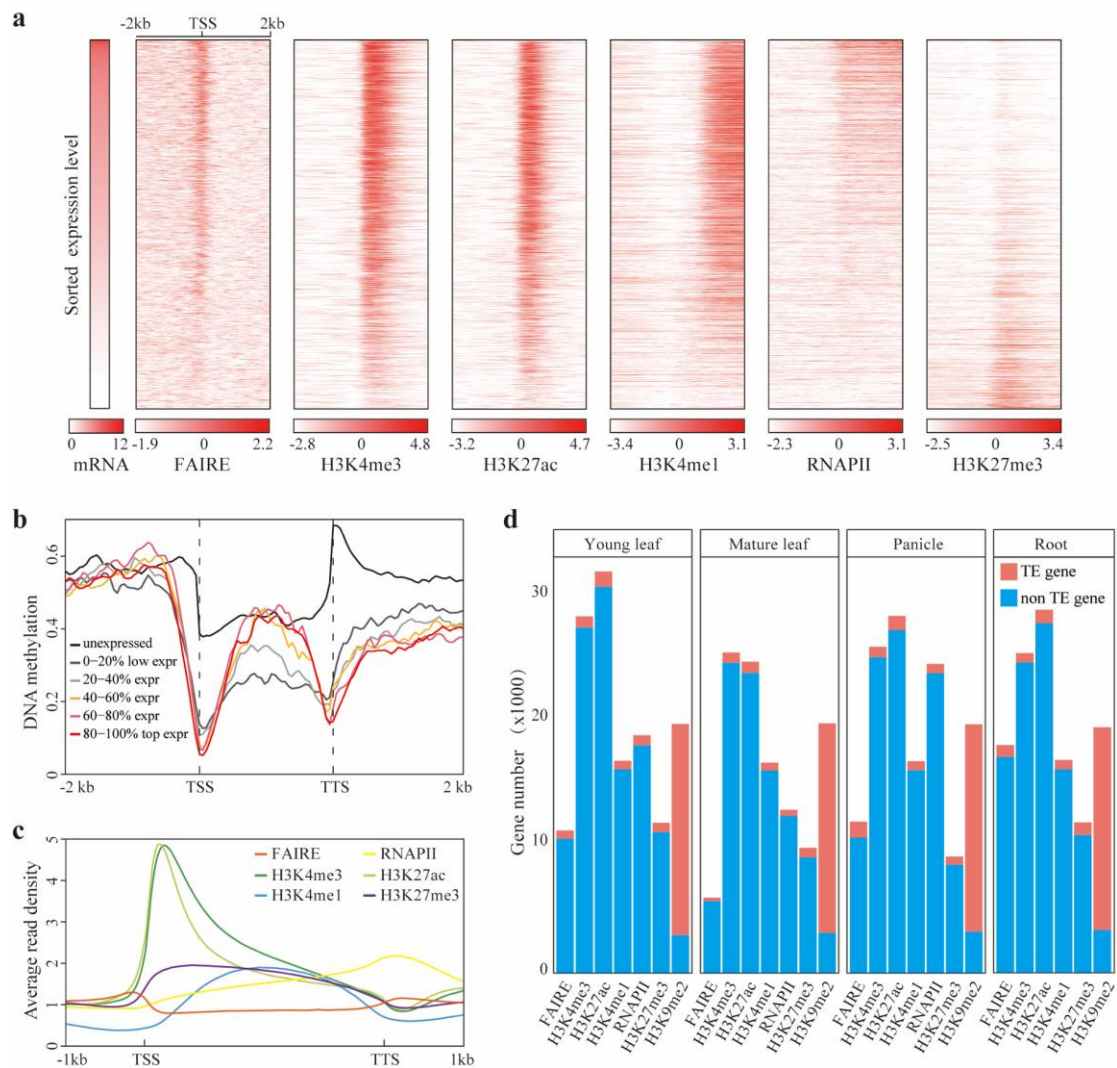

**Supplementary Fig. 5. The association among epigenomic modifications, transcription activity, TE genes and non-TE genes in MH63.**

**a**, Heatmap of epigenetic marks and RNAPII occupancy on all annotated rice genes, which were sorted according to their expression level determined by RNA-Seq. For each gene, the histone mark intensity is displayed along  $\pm 2$  kb regions around TSS. **b**, DNA methylation levels for genes showing different expression levels. The y-axis indicates the sample sizes used in the analysis. **c**, Distribution of histone marks, open chromatin (FAIRE), and RNAPII occupancy along genes in young leaves. The gene body was converted into percentiles to standardize genes with different lengths. Regions 1 kb upstream and downstream of the gene are shown. **d**, Number of TE and non-TE genes associated with histone marks, open chromatin, and RNAPII occupancy in the indicated tissues.



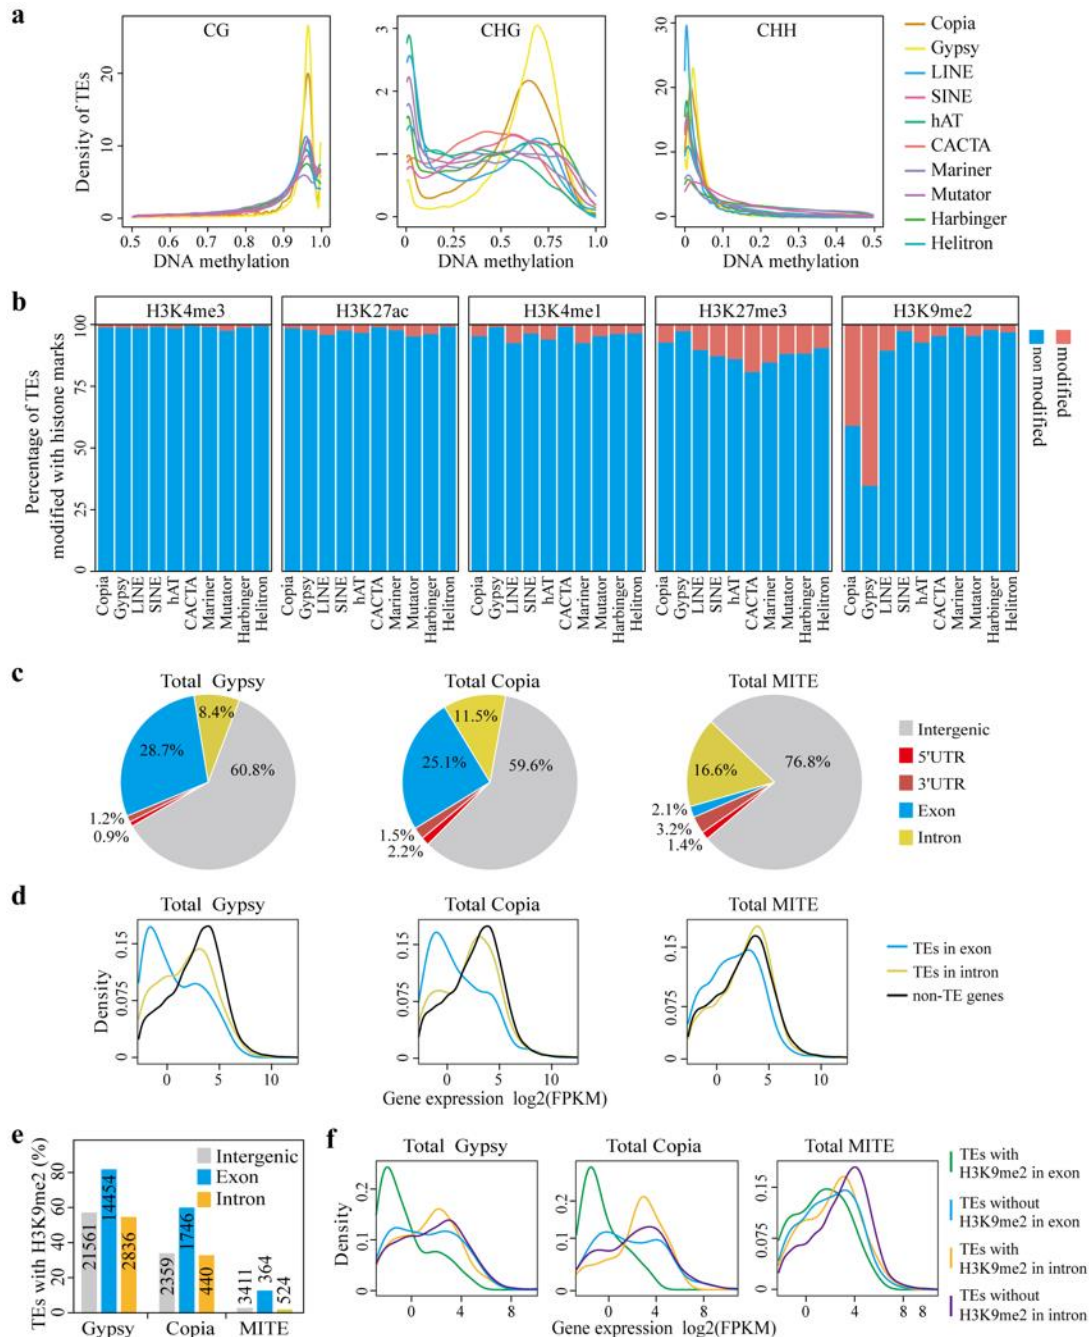

**Supplementary Fig. 6. DNA methylation and histone modifications of TEs and the effect on gene transcription in young leaves of MH63.**

**a**, Distribution of methylation levels for retrotransposons and DNA transposons. **b**, Percentage of TEs modified by different histone marks. A TE overlapped 1 bp with the histone peak was treated as this histone mark-modified TE. The y-axis indicates the sample sizes used in the analysis. **c**, Distribution of TEs in different regions of the rice genome. MITE includes hAT, CACTA, Mariner, Mutator, Mim, and Harbinger DNA transposons. **d**, Probability density curve of gene expression. TE genes associated with different TEs located in the exon or intron, and non-TE genes are shown.



Genes associated with TEs in exons have higher proportion with low expression. Retrotransposons (*Gypsy* and *Copia*) were more likely to insert into exons than were DNA transposon MITEs. Genes with TEs located in exons had a larger proportion of unexpressed genes than did genes with TE located in introns and with no MITE. **e**, H3K9me2 modification rate of TEs located in different regions of the rice genome. **f**, Probability density curve of gene expression. TE genes mentioned in (**e**), with or without H3K9me2, are shown. TE genes associated with H3K9me2-modified exons have higher proportion with low expression. Source Data underlying Supplementary Figure 6d and 6f are provided as a Source Data file.

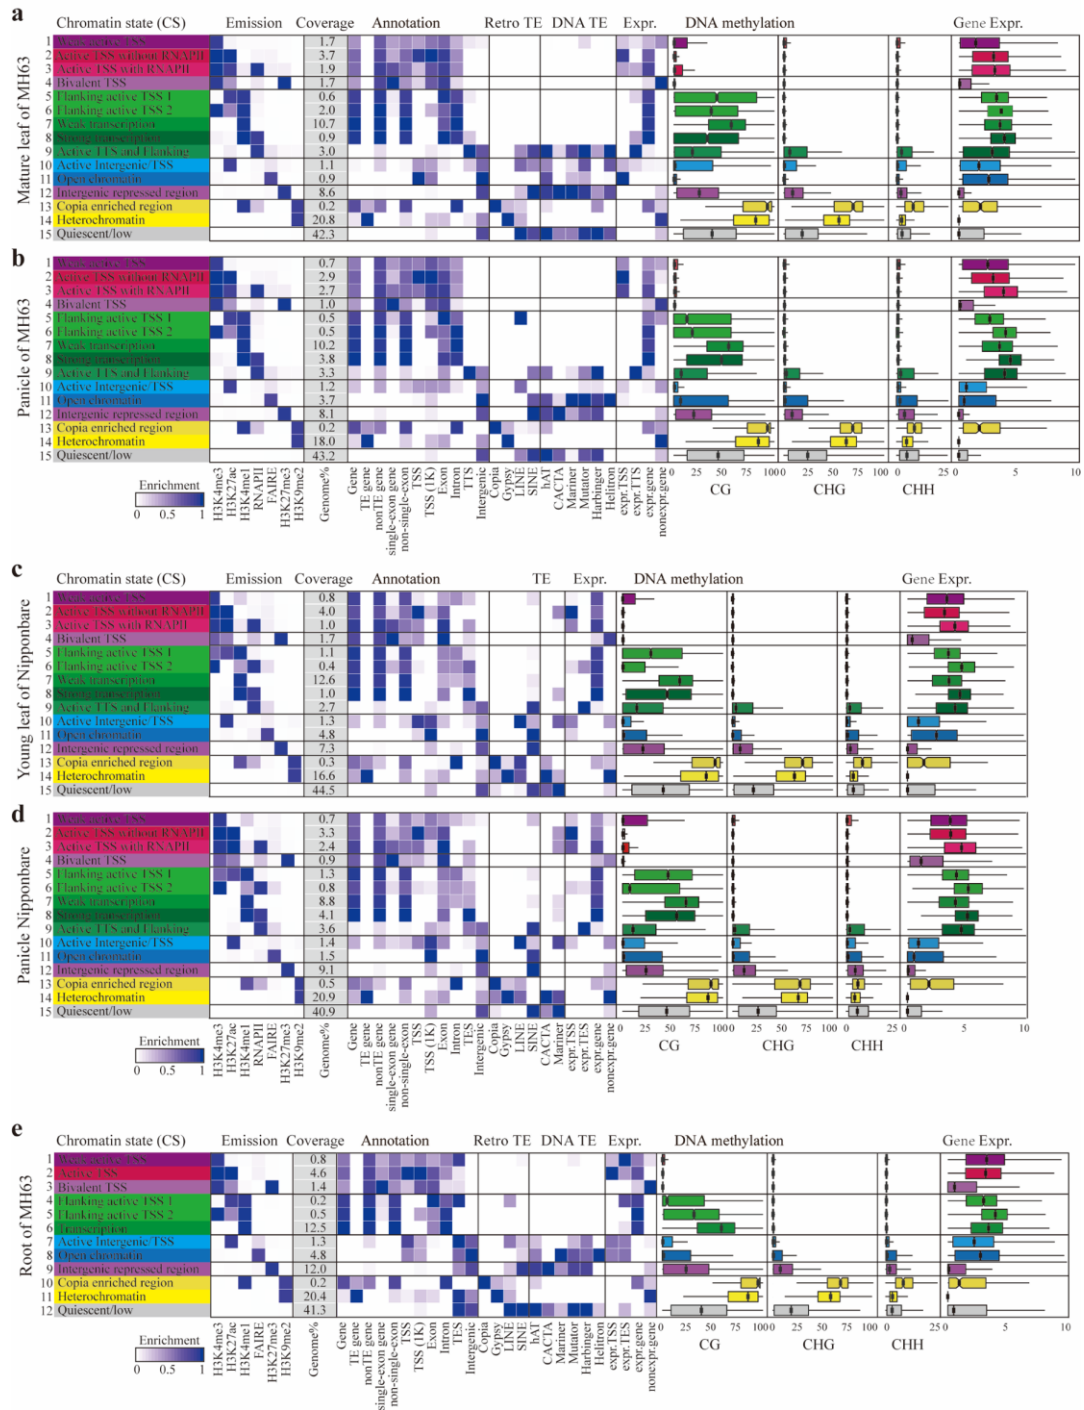

**Supplementary Fig. 7. Chromatin state (CS), TE enrichment, DNA methylation, and gene expression for different rice tissues from MH63 and Nipponbare.**

**a–d**, Enrichments for 15-state model based on five histone marks, FAIRE, and RNAPII occupancy in the indicated tissues and varieties. **e**, Enrichments for 12-state model based on five histone marks and FAIRE in root. Cov, genome coverage; Expr, enrichments of expression. Boxplots in **a–e** include a median with quartiles and outliers above the top whisker. Coverage in **a** showed the total bin size in whole genome, which indicate the sample sizes used in the analysis.

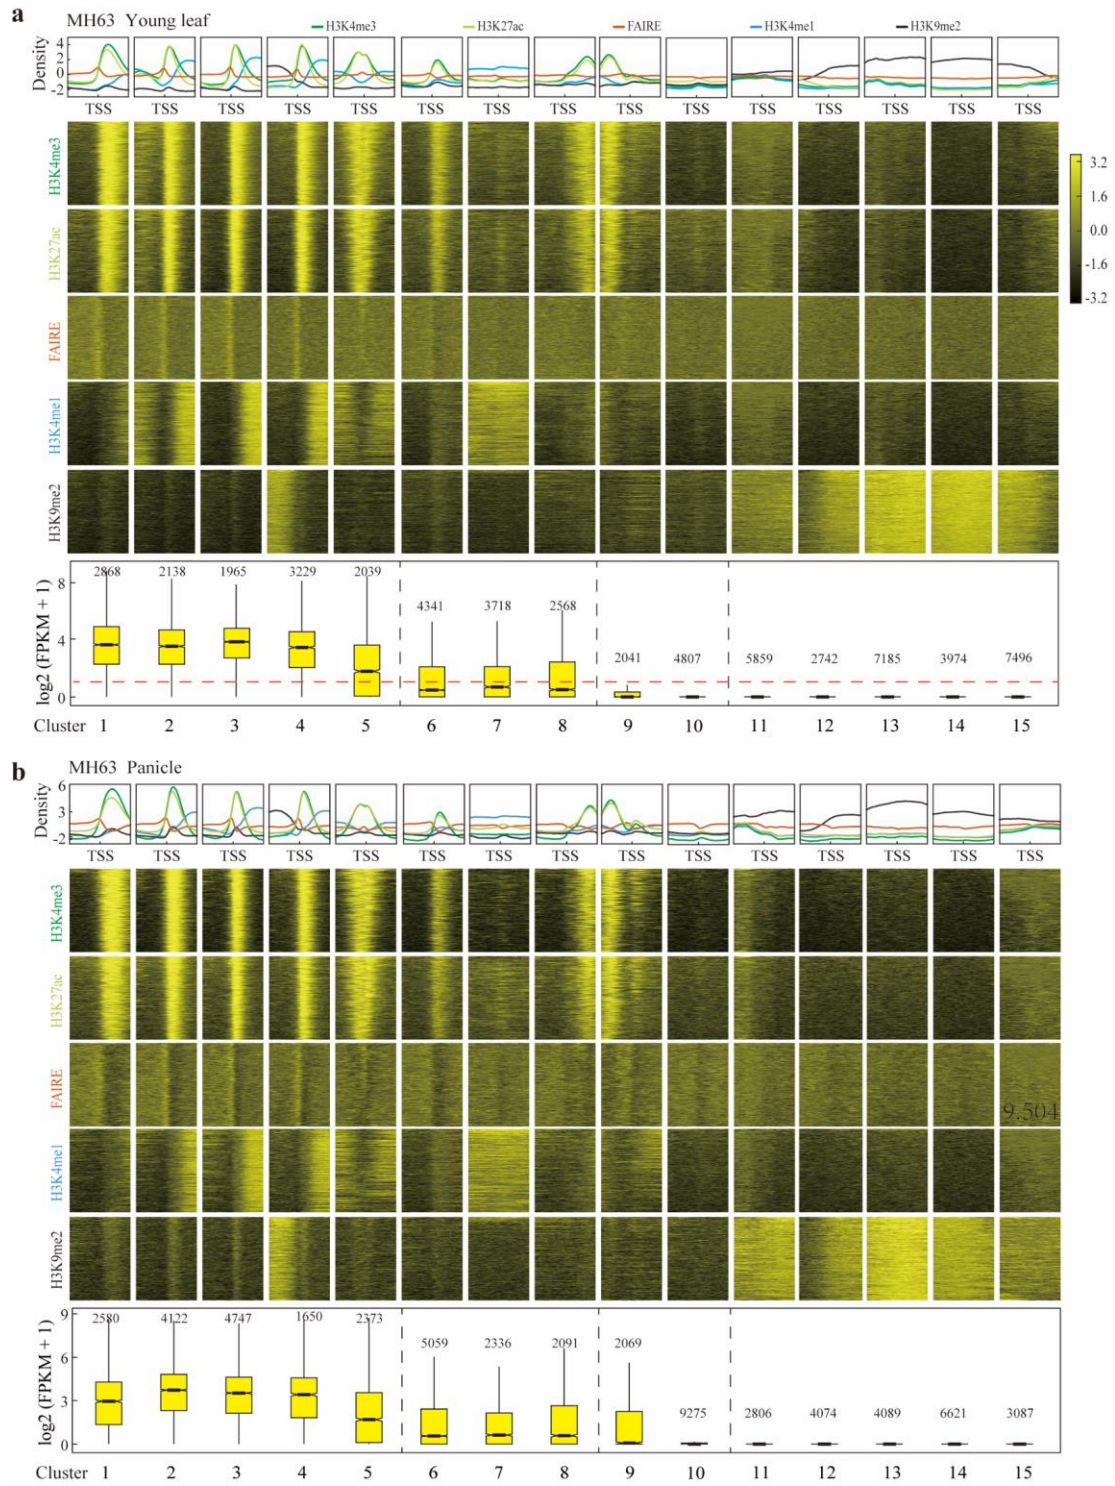

**Supplementary Fig. 8. Epigenetic features and transcription activities of promoters in MH63.**

**a, b**, 15 clusters of promoters defined by four histone marks and open chromatin in the indicated tissue, and transcriptional activity of genes in each cluster. Boxplots in **a, b** include a median with quartiles and outliers above the top whisker. The numbers indicate sample size used in the analysis.



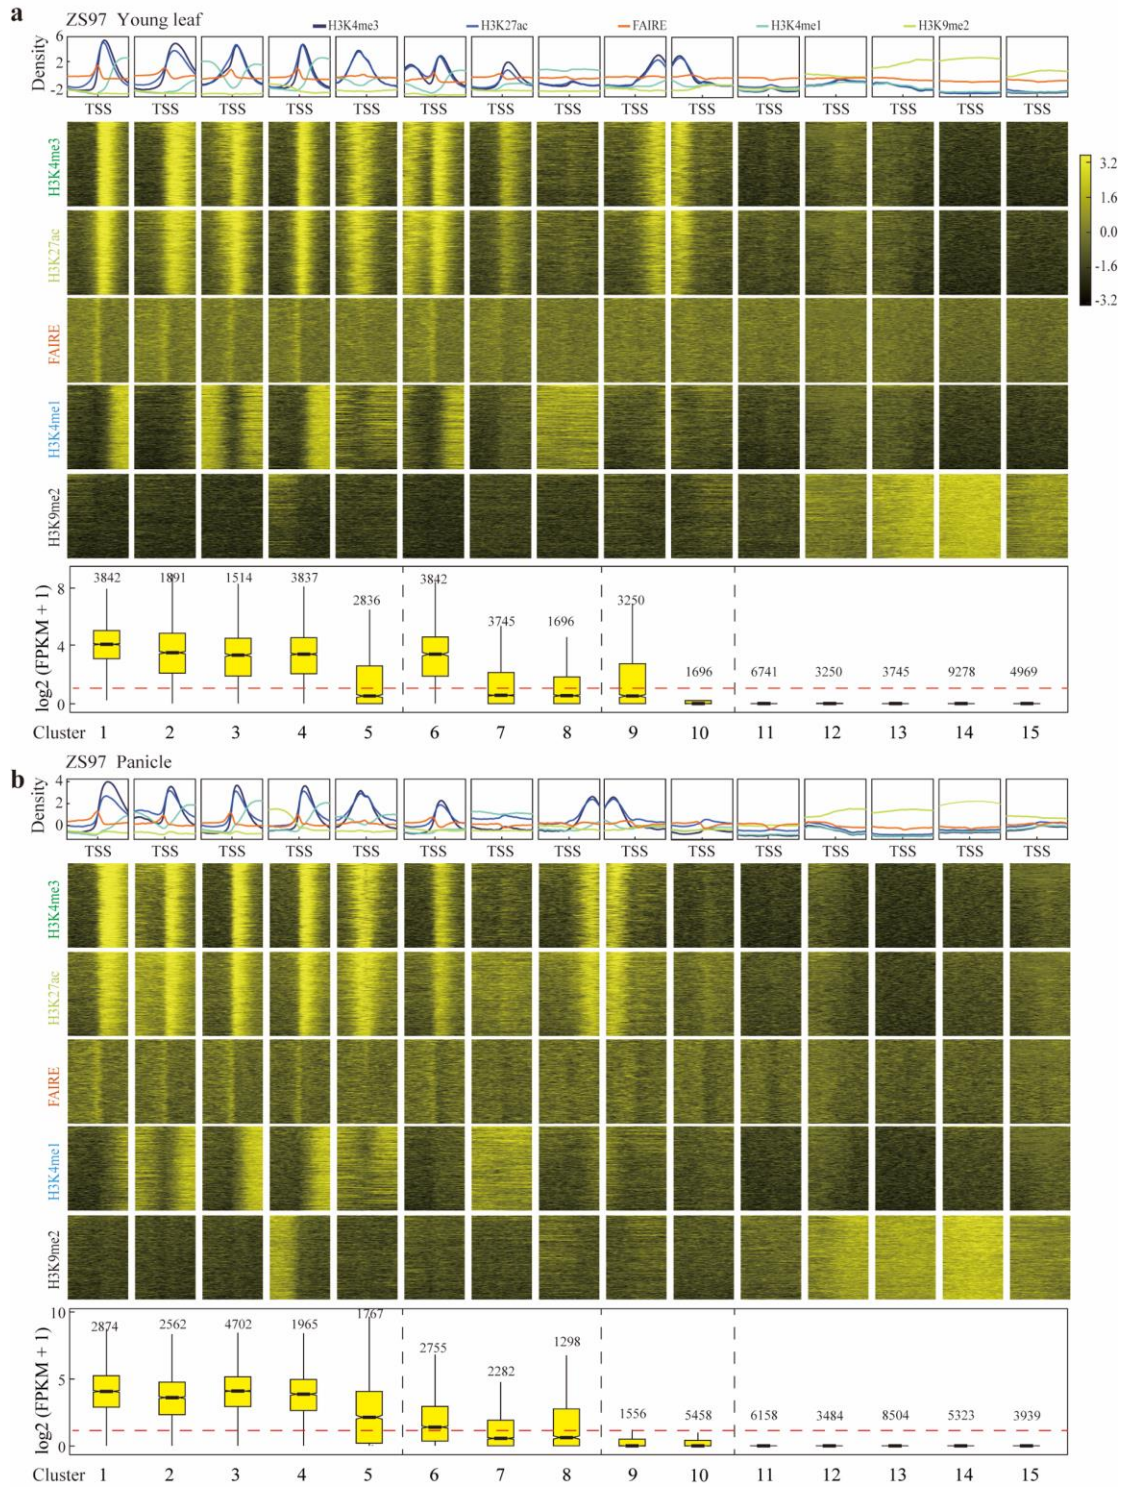

**Supplementary Fig. 9. Epigenetic features and transcription activities of promoters in ZS97.**

**a, b**, 15 clusters of promoters defined by four histone marks and open chromatin in the indicated tissue, and transcriptional activity of genes in each cluster. Boxplots in **a, b** include a median with quartiles and outliers above the top whisker. The numbers indicate sample size used in the analysis.

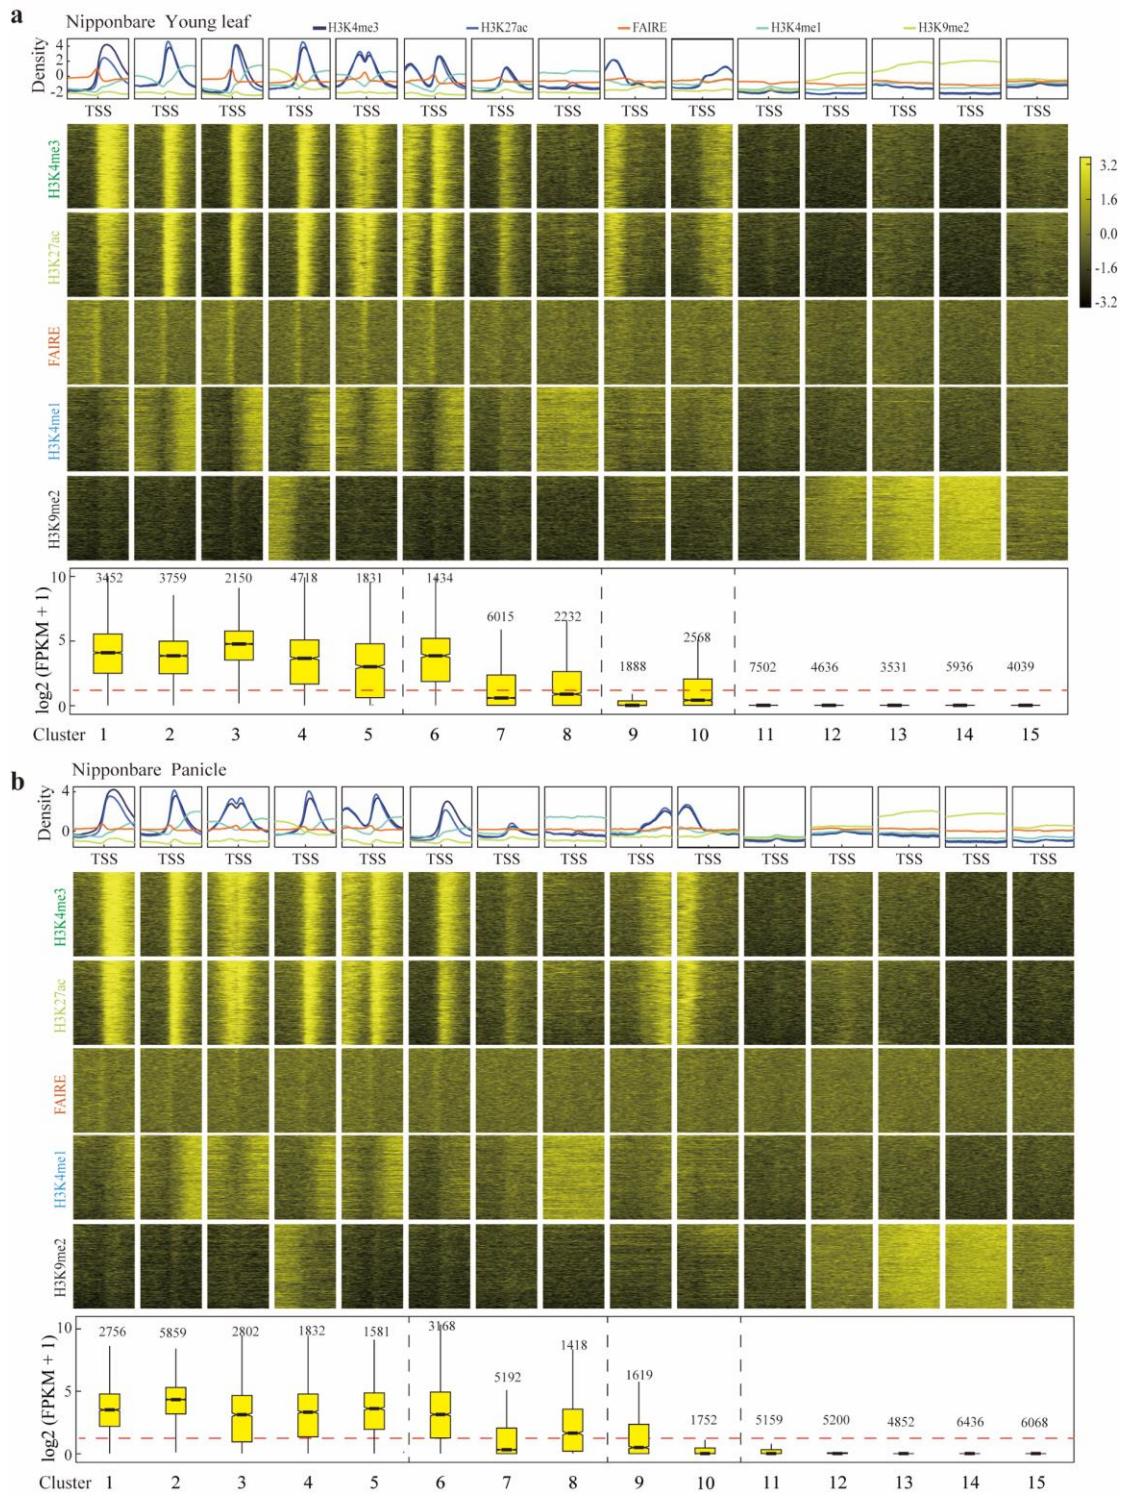

**Supplementary Fig. 10. Epigenetic features and transcription activities of promoters in Nipponbare.**

**a, b**, 15 clusters of promoters defined by four histone marks and open chromatin in the indicated tissue, and transcriptional activity of genes in each cluster. Boxplots in **a, b** include a median with quartiles and outliers above the top whisker. The numbers indicate sample size used in the analysis.



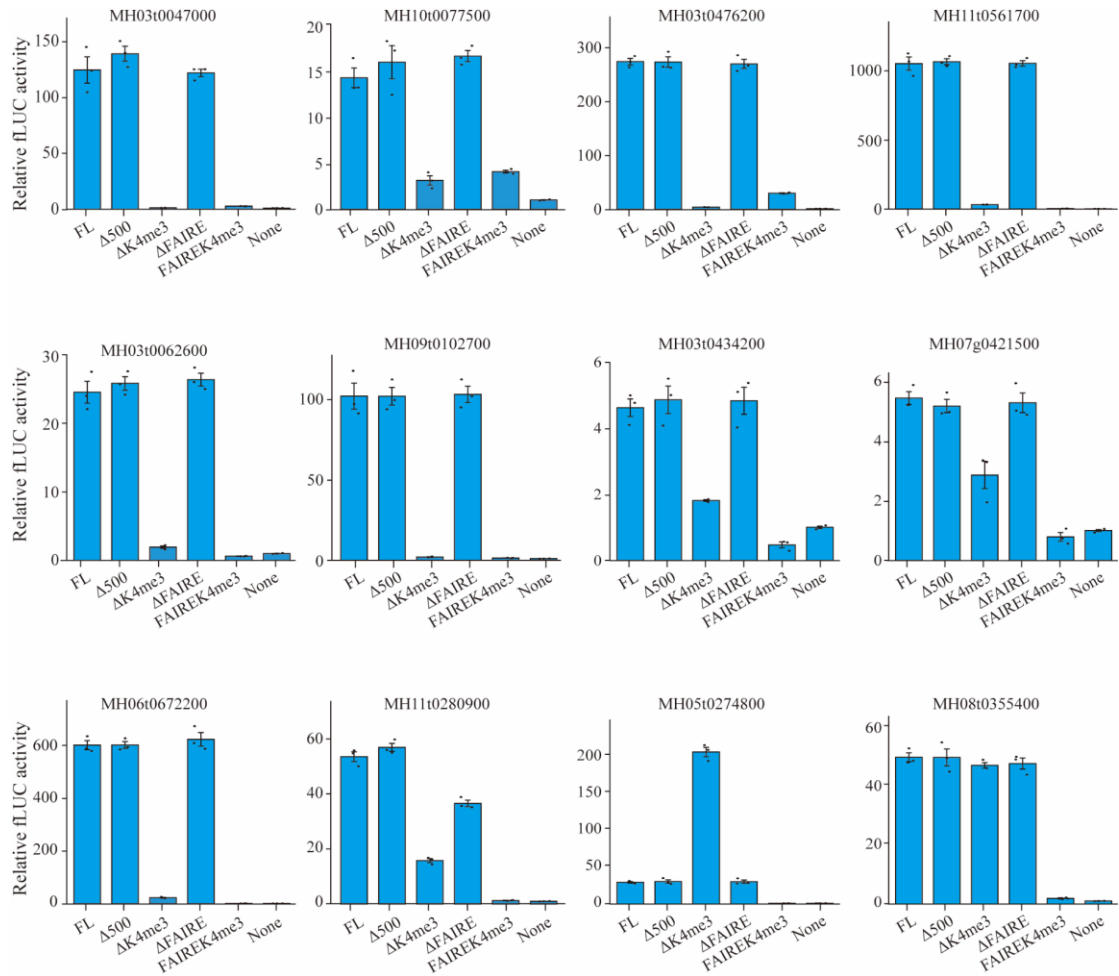

**Supplementary Fig. 11. The effect of FAIRE and H3K4me3-marked promoter regions on transcription.**

Similar to the descriptions in Fig. 3b, a transient reporter assay was used to examine the effects of different promoter regions on gene expression in rice protoplasts. The relative fLUC activities from 12 randomly selected genes are shown. Empty vector served as the negative control. The data indicate the relative luminescence level. Each value represents the mean  $\pm$  standard error of mean ( $n = 3$  biological replicates). Source data are provided as a Source Data file.

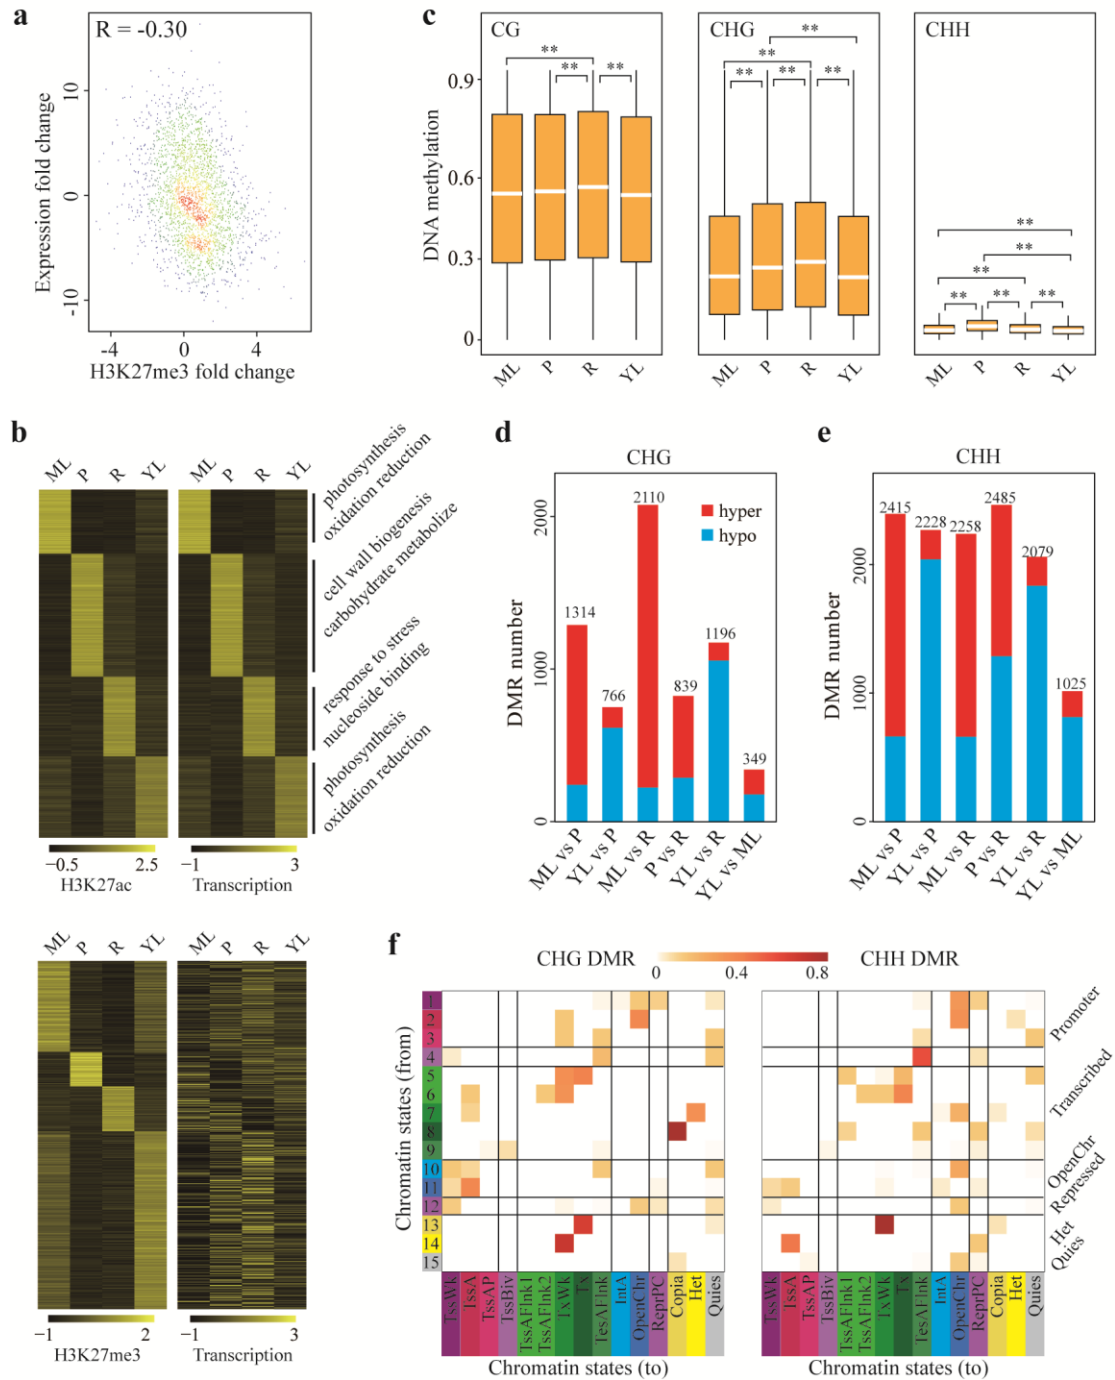

**Supplementary Fig. 12. Dynamics of epigenetic marks and gene expression in MH63 tissues.**

**a**, Correlations of log<sub>2</sub> fold-change in H3K27me3 and gene expression between mature leaf and panicle. **b**, Dynamics of histone marks and transcription in four tissues. Heatmaps of tissue-specific histone marks and gene expression levels are presented. Biological GO functions enriched for differentially regulated genes with elevated expression are shown. ML, mature leaf; P, panicle; R, root; YL, young leaf. **c**, Comparison of DNA methylation levels in different tissues. The whole genome was divided into 200-bp bins to calculate the DNA methylation levels.



Boxplots in **c** show the median, third and first quartiles. \*\*  $p < 0.01$  from Wilcoxon test. The numbers indicate the sample size used in the analysis. **d, e**, Numbers of CHG and CHH DMRs in different tissues. **f**, Log10 ratio of relative CG and CHH DMR switch frequency with which a region switches from one chromatin state (row) to another (column). Source Data underlying Supplementary Figure 12f is provided as a Source Data file.

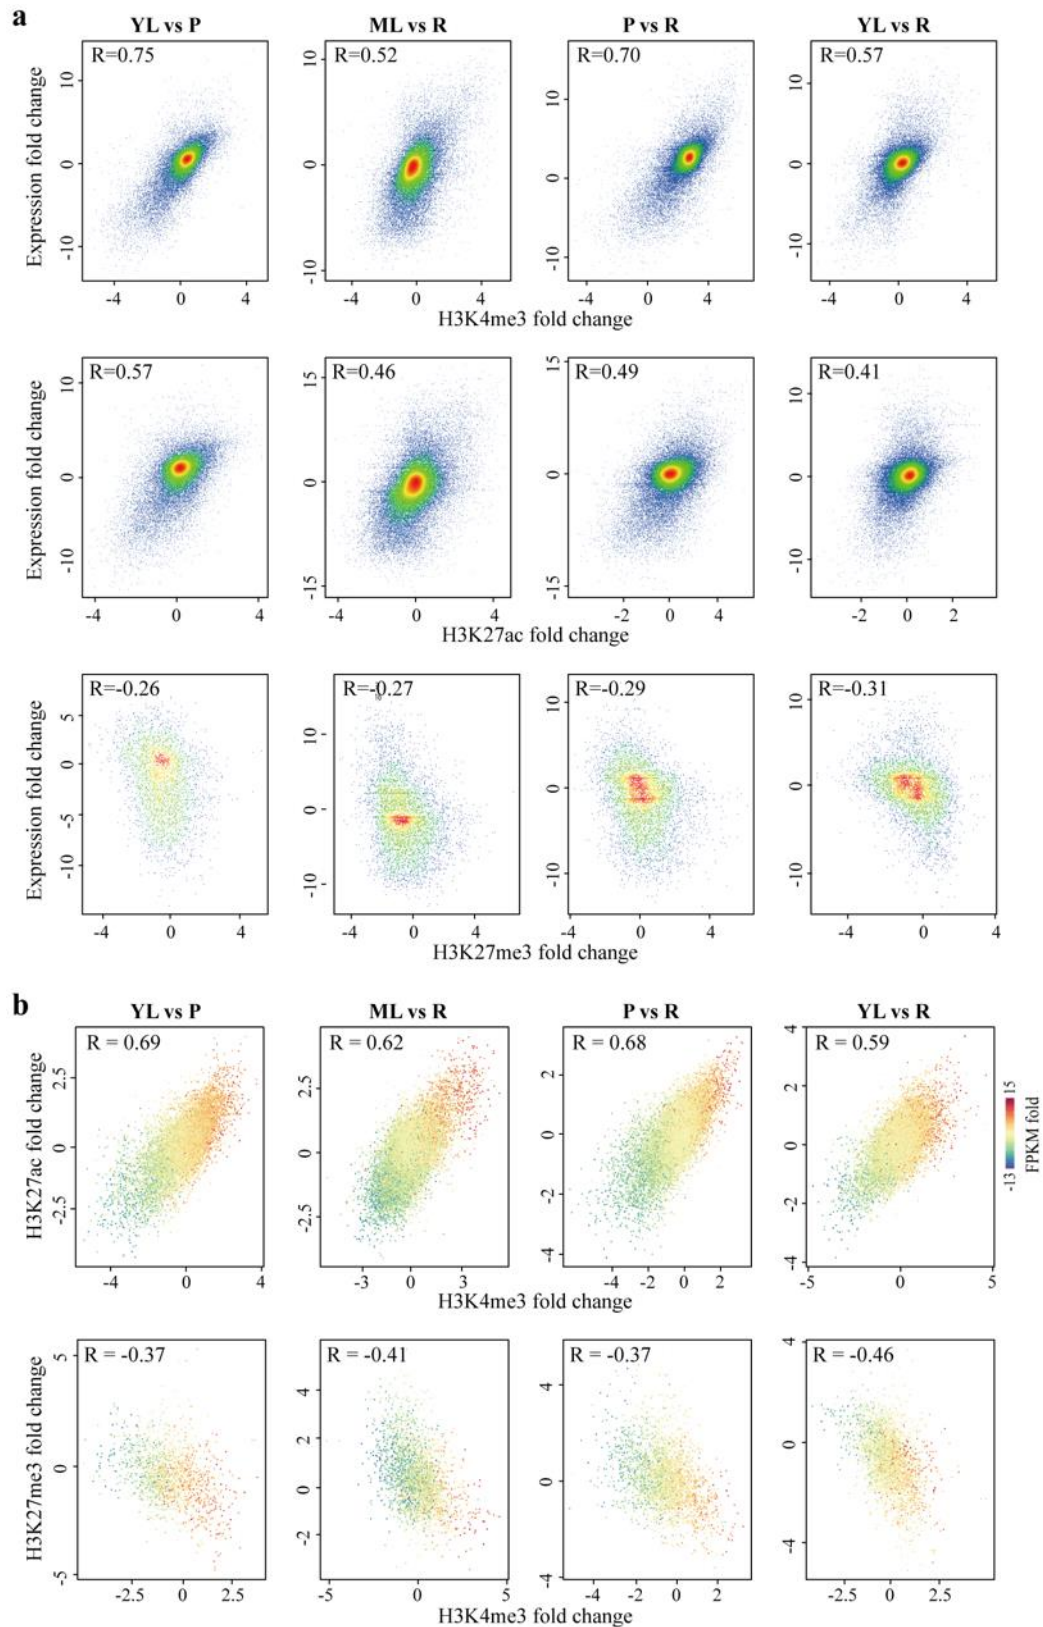

**Supplementary Fig. 13. Dynamics of histone marks and gene expression in different tissues.**

**a**, Correlations of log<sub>2</sub> fold-changes in a single histone mark and gene expression between the indicated tissues. **b**, Correlations of log<sub>2</sub> fold-changes in H3K4me<sub>3</sub> and H3K27ac (or H3K27me<sub>3</sub>)

between the indicated tissues. Color scale indicates the fold-changes in gene expression. Only data of genes with both H3K4me3 and H3K27ac (or H3K27me3) marks are plotted here. ML, mature leaf; P, panicle; R, root; YL, young leaf.

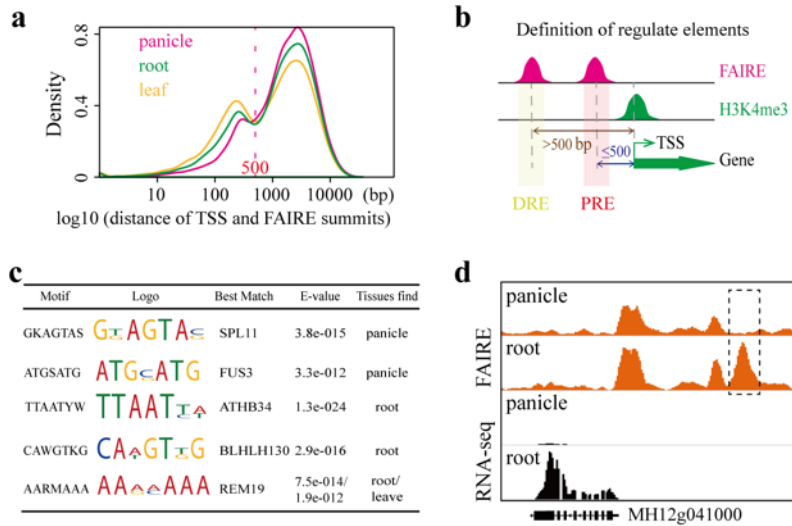

**Supplementary Fig. 14. FAIRE-defined distal and proximal DNA regulatory elements.**

**a**, Density distribution of the distance between FAIRE summits and TSS. Red dotted line represents the position of 500 bp upstream of TSS. **b**, Schematic diagram for definition of distal regulatory element (DREs) and proximal regulatory element (PREs). **c**, Motifs identified in the tissue-specific DREs. **d**, An example showing that the expression levels of *MH12g041000* proximal to the DRE (dotted box) was enhanced in the root, but not in the panicle. Source Data underlying Supplementary Figure 14a is provided as a Source Data file.

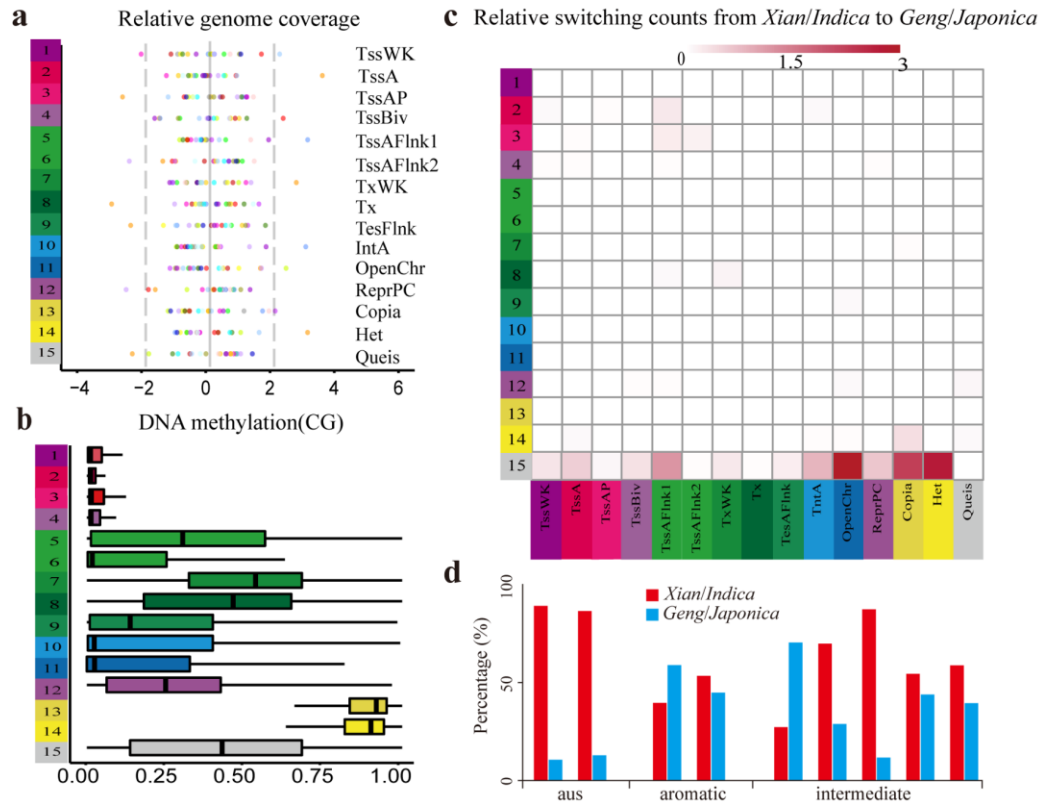

**Supplementary Fig. 15. Rice varieties differences in chromatin states.**

**a**, Relative chromatin state frequency for each reference epigenome in 20 rice varieties. **b**, DNA methylation level of chromatin state, labeled with each state. **c**, Relative switch frequency of chromatin states from *Xian/Indica* to *Geng/Japonica*. Boxplots in **b** show the median, third and first quartiles. **d**. Trends of chromatin state in Aus, ARO (aromatic) and Int (intermediate) subpopulations. Only *Xian/Indica* and *Geng/Japonica* different regions about 45000 bins (per 200 bp) are considered. Source Data underlying Supplementary Figure 15a, 15c, and 15d are provided as a Source Data file.

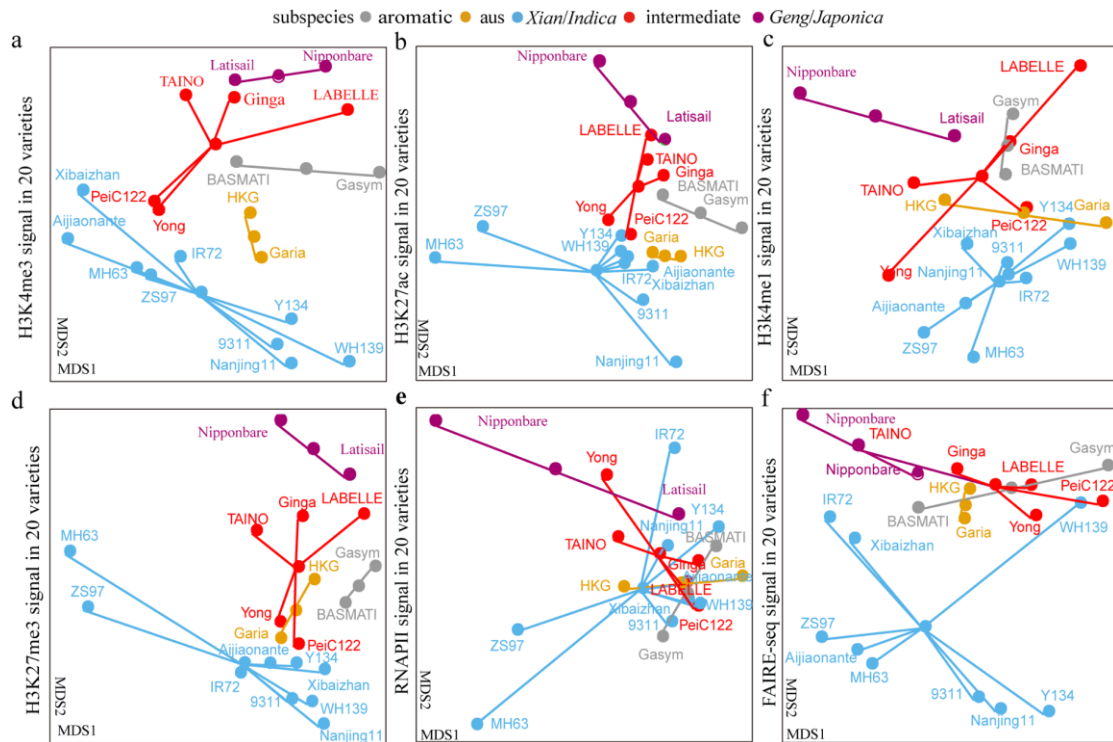

**Supplementary Fig. 16. NMDS analysis for Epigenetic signal in 20 rice Varieties.**

**a–f**, Non-metric Multidimensional scaling (NMDS) plots indicate the relationships of 20 rice varieties based on similarity in each epigenetic signal. First two dimensions are shown as MDS1 versus MDS2. Source Data are provided as a Source Data file.

**Supplementary Table 1. Summary of regular ChIP-seq and eChIP-seq data from rice young leaves.**

| Antibody          | Sample title      | Raw data         | Clean data | Mapped reads | Mapping rate | Peak No. | FRiP   | NSC    | RSC  |
|-------------------|-------------------|------------------|------------|--------------|--------------|----------|--------|--------|------|
| <b>H3K4me3</b>    | eChIP 0.2g Rep 1  | 32,380,414       | 30,234,556 | 29,227,622   | 96.67%       | 27,626   | 78.63% | 1.60   | 1.03 |
|                   | eChIP 0.2g Rep 2  | 25,292,790       | 24,096,580 | 22,547,309   | 93.33%       | 25,327   | 77.94% | 1.71   | 1.05 |
|                   | eChIP 0.05g Rep 1 | 38,662,656       | 36,898,890 | 34,500,250   | 93.50%       | 26,324   | 85.80% | 1.79   | 1.13 |
|                   | eChIP 0.05g Rep 2 | 63,664,220       | 57,977,455 | 55,277,397   | 95.34%       | 25,267   | 90.55% | 2.19   | 1.07 |
|                   | eChIP 0.01g Rep 1 | 29,618,844       | 28,252,006 | 26,254,860   | 92.93%       | 27,491   | 88.36% | 1.85   | 1.11 |
|                   | eChIP 0.01g Rep 2 | 27,242,970       | 23,976,505 | 22,508,421   | 93.88%       | 25,384   | 87.83% | 1.99   | 1.10 |
|                   | regular ChIP      | 27,828,322       | 26,562,340 | 25,078,347   | 94.41%       | 29,901   | 83.93% | 1.70   | 1.01 |
|                   | <b>H3K9me2</b>    | eChIP 0.2g Rep 1 | 67,743,714 | 61,472,015   | 60,988,077   | 99.21%   | 11,341 | 72.65% | 1.04 |
| eChIP 0.2g Rep 2  |                   | 26,368,192       | 25,353,242 | 25,103,775   | 99.02%       | 12,079   | 80.72% | 1.06   | 1.06 |
| eChIP 0.05g Rep 1 |                   | 21,092,424       | 19,494,763 | 19,209,170   | 98.54%       | 11,016   | 73.10% | 1.05   | 1.22 |
| eChIP 0.05g Rep 2 |                   | 44,774,648       | 40,367,759 | 38,729,736   | 95.94%       | 13,457   | 84.86% | 1.08   | 1.05 |
| eChIP 0.01g Rep 1 |                   | 36,291,684       | 34,669,137 | 31,375,536   | 90.50%       | 12,719   | 73.86% | 1.05   | 0.90 |
| eChIP 0.01g Rep 2 |                   | 44,774,648       | 27,490,715 | 26,143,784   | 95.10%       | 13,895   | 80.04% | 1.06   | 0.99 |
| regular ChIP      |                   | 50,162,278       | 47,874,510 | 44,671,828   | 93.31%       | 14,779   | 61.38% | 1.05   | 0.79 |

FRiP, fraction of reads in peaks; NSC, normalized strand coefficient; RSC, relative strand correlation.



**Supplementary Table 2. Summary of rice epigenome datasets generated in this study.**

| Tissue      | Variety         | eChIP-Seq | FAIRE-Seq | RNA-Seq | WGBS | low input eChIP | regular ChIP-Seq | ChIP-re ChIP |     |
|-------------|-----------------|-----------|-----------|---------|------|-----------------|------------------|--------------|-----|
| Young leaf  | MH63            | 12        | 2         | 2       | 1    | 12              | 2                | 6            |     |
| Young leaf  | ZS97            | 12        | 2         | 2       | 1    |                 |                  |              |     |
| Young leaf  | Nip             | 12        | 2         | 2       | 1    |                 |                  |              |     |
| Young leaf  | Aijiaonante     | 12        | 2         | 2       | 1    |                 |                  |              |     |
| Young leaf  | PeiC122         | 12        | 2         | 2       | 1    |                 |                  |              |     |
| Young leaf  | Xibaizhan       | 12        | 2         | 2       | 1    |                 |                  |              |     |
| Young leaf  | WH139           | 12        | 2         | 2       | 1    |                 |                  |              |     |
| Young leaf  | 9311            | 12        | 2         | 2       | 1    |                 |                  |              |     |
| Young leaf  | Nanjing11       | 12        | 2         | 2       | 1    |                 |                  |              |     |
| Young leaf  | Gasym Hany      | 12        | 2         | 2       | 1    |                 |                  |              |     |
| Young leaf  | HKG 98          | 12        | 2         | 2       | 1    |                 |                  |              |     |
| Young leaf  | Yong Chal Byo   | 12        | 2         | 2       | 1    |                 |                  |              |     |
| Young leaf  | TAINO 38        | 12        | 2         | 2       | 1    |                 |                  |              |     |
| Young leaf  | Y134            | 12        | 2         | 2       | 1    |                 |                  |              |     |
| Young leaf  | IR72            | 12        | 2         | 2       | 1    |                 |                  |              |     |
| Young leaf  | Latisai1        | 12        | 2         | 2       | 1    |                 |                  |              |     |
| Young leaf  | Ginga           | 12        | 2         | 2       | 1    |                 |                  |              |     |
| Young leaf  | Garia           | 12        | 2         | 2       | 1    |                 |                  |              |     |
| Young leaf  | LABELLE         | 12        | 2         | 2       | 1    |                 |                  |              |     |
| Young leaf  | BASMATI 385     | 12        | 2         | 2       | 1    |                 |                  |              |     |
| Panicle     | MH63, ZS97, Nip | 36        | 6         | 6       | 4    |                 |                  |              |     |
| Root        | MH63, ZS97, Nip | 30        | 6         | 6       | 4    |                 |                  |              |     |
| Mature leaf | MH63, ZS97, Nip | 36        | 6         | 6       | 4    |                 |                  |              |     |
| Total       |                 | 342       | 58        | 58      | 32   | 12              | 2                | 6            | 510 |

eChIP-Seq (including two regular ChIP-Seq) data of five histone modification marks (H3K4me3, H3K27ac, H3K4me1, H3K27me3, and H3K9me2), RNA polymerase II (RNAPII), and transcription factor. WGBS, whole-genome bisulfite sequencing. Each experiment has two biological replications.

**Supplementary Table 3. RNA-Seq data for different tissues used in this study.**

| Tissue number | Tissue                             | SRR accession | data link                                                                                                         | Varieties                                                                |
|---------------|------------------------------------|---------------|-------------------------------------------------------------------------------------------------------------------|--------------------------------------------------------------------------|
| 1             | Young leaf (two-week-old)          | SRR10751892   | <a href="https://www.ncbi.nlm.nih.gov/sra/?term=SRX7426703">https://www.ncbi.nlm.nih.gov/sra/?term=SRX7426703</a> | <i>Xian/Indica</i> (MH63, this study)                                    |
|               |                                    | SRR10751893   | <a href="https://www.ncbi.nlm.nih.gov/sra/?term=SRX7426704">https://www.ncbi.nlm.nih.gov/sra/?term=SRX7426704</a> |                                                                          |
| 2             | Flag leaf before flower transition | SRR10751898   | <a href="https://www.ncbi.nlm.nih.gov/sra/?term=SRX7426709">https://www.ncbi.nlm.nih.gov/sra/?term=SRX7426709</a> |                                                                          |
|               |                                    | SRR10751899   | <a href="https://www.ncbi.nlm.nih.gov/sra/?term=SRX7426710">https://www.ncbi.nlm.nih.gov/sra/?term=SRX7426710</a> |                                                                          |
| 3             | Panicle (1.5-4.5 cm)               | SRR10751894   | <a href="https://www.ncbi.nlm.nih.gov/sra/?term=SRX7426705">https://www.ncbi.nlm.nih.gov/sra/?term=SRX7426705</a> |                                                                          |
|               |                                    | SRR10751895   | <a href="https://www.ncbi.nlm.nih.gov/sra/?term=SRX7426706">https://www.ncbi.nlm.nih.gov/sra/?term=SRX7426706</a> |                                                                          |
| 4             | One-week-old root                  | SRR10751896   | <a href="https://www.ncbi.nlm.nih.gov/sra/?term=SRX7426707">https://www.ncbi.nlm.nih.gov/sra/?term=SRX7426707</a> |                                                                          |
|               |                                    | SRR10751987   | <a href="https://www.ncbi.nlm.nih.gov/sra/?term=SRX7426708">https://www.ncbi.nlm.nih.gov/sra/?term=SRX7426708</a> |                                                                          |
| 5             | Four-week-old root                 | SRR5134063    | <a href="https://www.ncbi.nlm.nih.gov/sra/?term=SRR5134063">https://www.ncbi.nlm.nih.gov/sra/?term=SRR5134063</a> | <i>Geng/Japonica</i> (Chilbo)                                            |
|               |                                    | SRR5134064    | <a href="https://www.ncbi.nlm.nih.gov/sra/?term=SRR5134064">https://www.ncbi.nlm.nih.gov/sra/?term=SRR5134064</a> |                                                                          |
| 6             | Calli (embryonic stage)            | SRR3724615    | <a href="https://www.ncbi.nlm.nih.gov/sra/?term=SRR3724615">https://www.ncbi.nlm.nih.gov/sra/?term=SRR3724615</a> | <i>Geng/Japonica</i> (TNG67)                                             |
|               |                                    | SRR3724616    | <a href="https://www.ncbi.nlm.nih.gov/sra/?term=SRR3724616">https://www.ncbi.nlm.nih.gov/sra/?term=SRR3724616</a> | <i>Xian/Indica</i> (IR64)                                                |
| 7             | Endosperm                          | SRR3123479    | <a href="https://www.ncbi.nlm.nih.gov/sra/?term=SRR3123479">https://www.ncbi.nlm.nih.gov/sra/?term=SRR3123479</a> | Hybrid of <i>Xian/Indica</i> (Longtefu) and <i>Geng/Japonica</i> (02428) |
|               |                                    | SRR3123481    | <a href="https://www.ncbi.nlm.nih.gov/sra/?term=SRR3123481">https://www.ncbi.nlm.nih.gov/sra/?term=SRR3123481</a> |                                                                          |
| 8             | Nodes I and II                     | SRR1777239    | <a href="https://www.ncbi.nlm.nih.gov/sra/?term=SRR1777239">https://www.ncbi.nlm.nih.gov/sra/?term=SRR1777239</a> | <i>O. sativa</i>                                                         |
|               |                                    | SRR1777240    | <a href="https://www.ncbi.nlm.nih.gov/sra/?term=SRR1777240">https://www.ncbi.nlm.nih.gov/sra/?term=SRR1777240</a> | <i>O. sativa</i>                                                         |

**Supplementary Table 3. RNA-Seq data for different tissues used in this study (continued).**

| Tissue number | Tissue                       | SRR accession | data link                                                                                                                              | Varieties                         |
|---------------|------------------------------|---------------|----------------------------------------------------------------------------------------------------------------------------------------|-----------------------------------|
| 9             | Stem                         | SRR1777241    | <a href="https://www.ncbi.nlm.nih.gov/sra/?term=SRR1777241">https://www.ncbi.nlm.nih.gov/sra/?term= SRR1777241</a>                     | <i>O. sativa</i>                  |
|               |                              | SRR1777242    | <a href="https://www.ncbi.nlm.nih.gov/sra/?term=SRR1777241SRR1777242">https://www.ncbi.nlm.nih.gov/sra/?term= SRR1777241SRR1777242</a> | <i>O. sativa</i>                  |
| 10            | Flower buds before flowering | SRR1213690    | <a href="https://www.ncbi.nlm.nih.gov/sra/?term=SRR1213690">https://www.ncbi.nlm.nih.gov/sra/?term= SRR1213690</a>                     | <i>Geng/Japonica</i> (Nipponbare) |
| 11            | Flowers at the flowering day | SRR1213691    | <a href="https://www.ncbi.nlm.nih.gov/sra/?term=SRR1213691">https://www.ncbi.nlm.nih.gov/sra/?term= SRR1213691</a>                     |                                   |
| 12            | Milk grains                  | SRR1213696    | <a href="https://www.ncbi.nlm.nih.gov/sra/?term=SRR1213696">https://www.ncbi.nlm.nih.gov/sra/?term SRR1213696=</a>                     |                                   |
| 13            | Mature seeds                 | SRR1213697    | <a href="https://www.ncbi.nlm.nih.gov/sra/?term=SRR1213697">https://www.ncbi.nlm.nih.gov/sra/?term= SRR1213697</a>                     |                                   |
| 14            | Panicle (0.3-1.5 cm)         | SRR1633182    | <a href="https://www.ncbi.nlm.nih.gov/sra/?term=SRR1633182">https://www.ncbi.nlm.nih.gov/sra/?term= SRR1633182</a>                     | <i>Geng/Japonica</i> (DongJin)    |
|               |                              | SRR1633187    | <a href="https://www.ncbi.nlm.nih.gov/sra/?term=SRR1633187">https://www.ncbi.nlm.nih.gov/sra/?term= SRR1633187</a>                     |                                   |
| 15            | Egg cell                     | SRR976335     | <a href="https://www.ncbi.nlm.nih.gov/sra/?term=SRR976335">https://www.ncbi.nlm.nih.gov/sra/?term= SRR976335</a>                       | <i>Geng/Japonica</i> (Kitaake)    |
|               |                              | SRR976336     | <a href="https://www.ncbi.nlm.nih.gov/sra/?term=SRR976336">https://www.ncbi.nlm.nih.gov/sra/?term= SRR976336</a>                       |                                   |
|               |                              | SRR976337     | <a href="https://www.ncbi.nlm.nih.gov/sra/?term=SRR976337">https://www.ncbi.nlm.nih.gov/sra/?term= SRR976337</a>                       |                                   |
| 16            | Sperm cell                   | SRR976338     | <a href="https://www.ncbi.nlm.nih.gov/sra/?term=SRR976338">https://www.ncbi.nlm.nih.gov/sra/?term= SRR976338</a>                       |                                   |
|               |                              | SRR976339     | <a href="https://www.ncbi.nlm.nih.gov/sra/?term=SRR976339">https://www.ncbi.nlm.nih.gov/sra/?term= SRR976339</a>                       |                                   |
|               |                              | SRR976340     | <a href="https://www.ncbi.nlm.nih.gov/sra/?term=SRR976340">https://www.ncbi.nlm.nih.gov/sra/?term= SRR976340</a>                       |                                   |
| 17            | Vegetative cell              | SRR976341     | <a href="https://www.ncbi.nlm.nih.gov/sra/?term=SRR976341">https://www.ncbi.nlm.nih.gov/sra/?term= SRR976341</a>                       |                                   |
|               |                              | SRR976342     | <a href="https://www.ncbi.nlm.nih.gov/sra/?term=SRR976342">https://www.ncbi.nlm.nih.gov/sra/?term= SRR976342</a>                       |                                   |
|               |                              | SRR976343     | <a href="https://www.ncbi.nlm.nih.gov/sra/?term=SRR976343">https://www.ncbi.nlm.nih.gov/sra/?term= SRR976343</a>                       |                                   |

**Supplementary Table 3. RNA-Seq data for different tissues used in this study (continued).**

| <b>Tissue number</b> | <b>Tissue</b>              | <b>SRR accession</b> | <b>data link</b>                                                                                                 | <b>Varieties</b>                   |
|----------------------|----------------------------|----------------------|------------------------------------------------------------------------------------------------------------------|------------------------------------|
| 18                   | Three-week-old leaf        | SRR711322            | <a href="https://www.ncbi.nlm.nih.gov/sra/?term=SRR711322">https://www.ncbi.nlm.nih.gov/sra/?term= SRR711322</a> | <i>Geng/Japonica</i><br>Nipponbare |
|                      |                            | SRR711323            | <a href="https://www.ncbi.nlm.nih.gov/sra/?term=SRR711323">https://www.ncbi.nlm.nih.gov/sra/?term= SRR711323</a> |                                    |
| 19                   | Three-week-old calli       | SRR358795            | <a href="https://www.ncbi.nlm.nih.gov/sra/?term=SRR358795">https://www.ncbi.nlm.nih.gov/sra/?term= SRR358795</a> |                                    |
|                      |                            | SRR358797            | <a href="https://www.ncbi.nlm.nih.gov/sra/?term=SRR358797">https://www.ncbi.nlm.nih.gov/sra/?term= SRR358797</a> |                                    |
| 20                   | Lamina joints of flag leaf | SRR976168            | <a href="https://www.ncbi.nlm.nih.gov/sra/?term=SRR976168">https://www.ncbi.nlm.nih.gov/sra/?term= SRR976168</a> |                                    |

**Supplementary Table 4. Constructs and primer sequences used in this study.**

| Target                       | Construct      | Forward primer                                     | Reverse primer                                                |
|------------------------------|----------------|----------------------------------------------------|---------------------------------------------------------------|
| pMCFLM<br>C/p2RLM<br>C       | 35S terminator | GGGGTACCCGGCCATGCTA<br>GAGTCCG                     | TCCCCGCGGCTGCAGGTC<br>GACTCTAGAGGATCCAGG<br>TCACTGGATTTTGGTTT |
|                              | MCS            | GGAATTCCATATGGAATTC<br>GCATGCAAGCTTACTAGTC<br>C    | GGACTAGTAAGCTTGCAT<br>GCGAATTCCATATGGAAT<br>TCC               |
| MH07t010<br>0900<br>promoter | FL             | GGAATTCCATATGCTATTG<br>GGTATGTGGCATCCATAAC         | CCCAAGCTTCACAAACAA<br>ACAAACCACACAACC                         |
|                              | Δ500           | GGAATTCCATATGATACTT<br>GCCGAGTTTTTATACGAAT<br>GC   | CCCAAGCTTCACAAACAA<br>ACAAACCACACAACC                         |
|                              | ΔK4me3         | GGAATTCCATATGATACTT<br>GCCGAGTTTTTATACGAAT<br>GC   | CCCAAGCTTGGTTGGGTT<br>TCGTTACCTCG                             |
|                              | FAIREK4me3     | GGAATTCCATATGGAAAA<br>ACAACAATGAAATAACA<br>GAGAA   | CCCAAGCTTCACAAACAA<br>ACAAACCACACAACC                         |
|                              | ΔFAIRE         | GGAATTCCATATGCCGGCG<br>AGGTGAACGAAACC              | CCCAAGCTTCACAAACAA<br>ACAAACCACACAACC                         |
| MH03t004<br>7000<br>promoter | FL             | GGAATTCCATATGCCTCCC<br>TCTAAACTTGATACCCCG          | GGAATTGCCCCGTCAGGA<br>TTTCATCGTAC                             |
|                              | Δ500           | GGAATTCCATATGGTTATT<br>TGTTGGGGATTGGGATCTA         | GGAATTGCCCCGTCAGGA<br>TTTCATCGTAC                             |
|                              | ΔK4me3         | GGAATTCCATATGGTTATT<br>TGTTGGGGATTGGGATCTA         | GGAATTCATGGCTGGCTG<br>GTCTGCGAAG                              |
|                              | FAIREK4me3     | GGAATTCCATATGAATAGT<br>GTAATTGTACATCAAACGT<br>ATAA | GGAATTGCCCCGTCAGGA<br>TTTCATCGTAC                             |
|                              | ΔFAIRE         | GGAATTCCATATGTTGCA<br>GACCAGCCAGCCAT               | GGAATTGCCCCGTCAGGA<br>TTTCATCGTAC                             |

**Supplementary Table 4. Constructs and primer sequences used in this study (continued).**

|                              |            |                                                 |                                       |
|------------------------------|------------|-------------------------------------------------|---------------------------------------|
| MH10t007<br>7500<br>promoter | FL         | GGAATTCCATATGTTTCAGG<br>ACCTAGATATCACACCCGC     | CCCAAGCTTACAACCCCG<br>CAAATCGCCTAAAC  |
|                              | Δ500       | GGAATTCCATATGCAGATG<br>ACAAGGGAACATTCCTTTT<br>G | CCCAAGCTTACAACCCCG<br>CAAATCGCCTAAAC  |
|                              | ΔK4me3     | GGAATTCCATATGCAGATG<br>ACAAGGGAACATTCCTTTT<br>G | CCCAAGCTTGGGAGGAG<br>GTGGAGAGCTTCTAGA |
|                              | FAIREK4me3 | GGAATTCCATATGCGGTGA<br>AATATACCGCAGAGTATTT      | CCCAAGCTTACAACCCCG<br>CAAATCGCCTAAAC  |
|                              | ΔFAIRE     | GGAATTCCATATGTCCTCC<br>CATGGCGGCGACGA           | CCCAAGCTTACAACCCCG<br>CAAATCGCCTAAAC  |
| MH03t047<br>6200<br>promoter | FL         | GGAATTCGGGGTCGCTGGA<br>GATGGAGACG               | CCCAAGCTTATGCGACCA<br>AGGCGAGGGGA     |
|                              | Δ500       | GGAATTCTCGTTGATGTTA<br>CAGTGTCGCATGATG          | CCCAAGCTTATGCGACCA<br>AGGCGAGGGGA     |
|                              | ΔK4me3     | GGAATTCTCGTTGATGTTA<br>CAGTGTCGCATGATG          | CCCAAGCTTGCATGTGGG<br>CCTCCCGTCGC     |
|                              | FAIREK4me3 | GGAATTCTTACAAAACGC<br>TCTTACAAGGTCT             | CCCAAGCTTATGCGACCA<br>AGGCGAGGGGA     |
|                              | ΔFAIRE     | GGAATTCGAGGGAAGCG<br>AAGGTAAGGAA                | CCCAAGCTTATGCGACCA<br>AGGCGAGGGGA     |
| MH11t056<br>1700<br>promoter | FL         | GGAATTCTTTTGTCGCCTA<br>TTTTTTCACGG              | CCCAAGCTTACATACCTT<br>GCCATCGACTTCCC  |
|                              | Δ500       | GGAATTCGATATATGCACG<br>TGTTCTCCTGGTGA           | CCCAAGCTTACATACCTT<br>GCCATCGACTTCCC  |
|                              | ΔK4me3     | GGAATTCGATATATGCACG<br>TGTTCTCCTGGTGA           | CCCAAGCTTGGTGCCGCC<br>TCTTCAAATCTCTCC |
|                              | FAIREK4me3 | GGAATTCGGTTTTTCTTTTC<br>TTTTTCCGCACT            | CCCAAGCTTACATACCTT<br>GCCATCGACTTCCC  |
|                              | ΔFAIRE     | GGAATTCCTGGGCGTTTTTC<br>CGTGTTTGAAT             | CCCAAGCTTACATACCTT<br>GCCATCGACTTCCC  |

**Supplementary Table 4. Constructs and primer sequences used in this study (continued).**

|                              |            |                                                  |                                         |
|------------------------------|------------|--------------------------------------------------|-----------------------------------------|
| MH03t006<br>2600<br>promoter | FL         | GGAATTCCTTCAGTTCACC<br>CAAAAAAAAAATCCT           | CCCAAGCTTAATTTAAATC<br>CGGACCACACAAGTTT |
|                              | Δ500       | GGAATTCCTCTCTGGCAC<br>AACTGACCTTG                | CCCAAGCTTAATTTAAATC<br>CGGACCACACAAGTTT |
|                              | ΔK4me3     | GGAATTCCTCTCTGGCAC<br>AACTGACCTTG                | CCCAAGCTTAGCTGACGT<br>GAACCATCGTCGC     |
|                              | FAIREK4me3 | GGAATTCTGAAGAGGAGG<br>AGCCGCAAGAA                | CCCAAGCTTAATTTAAATC<br>CGGACCACACAAGTTT |
|                              | ΔFAIRE     | GGAATTCGCCTTACCTGTT<br>GTGTTCTTCGTC              | CCCAAGCTTAATTTAAATC<br>CGGACCACACAAGTTT |
| MH09t010<br>2700<br>promoter | FL         | GGAATTCATATGTAACGC<br>CACCAACCTCCTCACTATT        | CCCAAGCTTAACCACAAC<br>CAAGAAACCGCCC     |
|                              | Δ500       | GGAATTCATATGTTTCTA<br>TTTTCAGGATAAACCATGT<br>CGG | CCCAAGCTTAACCACAAC<br>CAAGAAACCGCCC     |
|                              | ΔK4me3     | GGAATTCATATGTTTCTA<br>TTTTCAGGATAAACCATGT<br>CGG | CCCAAGCTTTCGCGATTC<br>CTCTCTCCGTCTC     |
|                              | FAIREK4me3 | GGAATTCATATGTCTCCG<br>TGAAAAACAATATGATG          | CCCAAGCTTAACCACAAC<br>CAAGAAACCGCCC     |
|                              | ΔFAIRE     | GGAATTCATATGCCGACC<br>CTCCTCTCGTCTATC            | CCCAAGCTTAACCACAAC<br>CAAGAAACCGCCC     |
| MH03t043<br>4200<br>promoter | FL         | CGAGCTCGTAGATCCTTGT<br>ACCAGCGTACCC              | GGAATTCTAAAAAGTTCC<br>TACCAGAATCGCC     |
|                              | Δ500       | CGAGCTCGAAGGAGGGAG<br>TACTTGTCAA                 | GGAATTCTAAAAAGTTCC<br>TACCAGAATCGCC     |
|                              | ΔK4me3     | CGAGCTCGAAGGAGGGAG<br>TACTTGTCAA                 | GGAATTCGCTTGAGGGAA<br>ACCATCGCC         |
|                              | FAIREK4me3 | CGAGCTCTTTTGTGTGAAT<br>GACTAATGGGTCC             | GGAATTCTAAAAAGTTCC<br>TACCAGAATCGCC     |
|                              | ΔFAIRE     | CGAGCTCTACCGTATGAT<br>GTTCTGTGCCTGC              | GGAATTCTAAAAAGTTCC<br>TACCAGAATCGCC     |



**Supplementary Table 4. Constructs and primer sequences used in this study (continued).**

|                              |            |                                                     |                                        |
|------------------------------|------------|-----------------------------------------------------|----------------------------------------|
| MH07g042<br>1500<br>promoter | FL         | GGAATTCTTGGTTAAAATT<br>ATTTCTAGGGCTCTG              | CCCAAGCTTTCAGGATTG<br>GACAACATAAAACACC |
|                              | Δ500       | GGAATTCTTTTGGTTTGA<br>CTGATATGTGGAT                 | CCCAAGCTTTCAGGATTG<br>GACAACATAAAACACC |
|                              | ΔK4me3     | GGAATTCTTTTGGTTTGA<br>CTGATATGTGGAT                 | CCCAAGCTTCATGGCTGG<br>ATTAGCTCGGTAG    |
|                              | FAIREK4me3 | GGAATTCTTTTGGTTTGA<br>CTGATATGTGGAT                 | CCCAAGCTTTCAGGATTG<br>GACAACATAAAACACC |
|                              | ΔFAIRE     | GGAATTCATTCCTGAAGGT<br>CTGCGTGCTA                   | CCCAAGCTTTCAGGATTG<br>GACAACATAAAACACC |
| MH06t067<br>2200<br>promoter | FL         | GGAATTCCATATGCTGCAC<br>ATATATACACAGCGGGC            | CCCAAGCTTGCTAACCCC<br>TAACCCGAAACGAT   |
|                              | Δ500       | GGAATTCCATATGATATTT<br>TCATTAAATCTATAATTGA<br>ATAAT | CCCAAGCTTGCTAACCCC<br>TAACCCGAAACGAT   |
|                              | ΔK4me3     | GGAATTCCATATGATATTT<br>TCATTAAATCTATAATTGA<br>ATAAT | CCCAAGCTTGGCTGACCG<br>GATCGGCGAGGGC    |
|                              | FAIREK4me3 | GGAATTCCATATGTACCAT<br>CCATCTCGCTTCTGC              | CCCAAGCTTGCTAACCCC<br>TAACCCGAAACGAT   |
|                              | ΔFAIRE     | GGAATTCCATATGACGAGG<br>TATGCTGCTGTGCTGTGTG          | CCCAAGCTTGCTAACCCC<br>TAACCCGAAACGAT   |
| MH11t028<br>0900<br>promoter | FL         | GGAATTCCATATGCCAGT<br>TTTTTCCCCTGCATGT              | GGAATTCCTACCAGATCC<br>GATCATACTGAGCG   |
|                              | Δ500       | GGAATTCCATATGGAAGCA<br>GCTCCTTCTTGCGGAT             | GGAATTCCTACCAGATCC<br>GATCATACTGAGCG   |
|                              | ΔK4me3     | GGAATTCCATATGGAAGCA<br>GCTCCTTCTTGCGGAT             | GGAATTCAAACACAACG<br>ATCTGGCGCGGA      |
|                              | FAIREK4me3 | GGAATTCCATATGGTTGAG<br>GCATACGATTTAGATTAGC          | GGAATTCCTACCAGATCC<br>GATCATACTGAGCG   |
|                              | ΔFAIRE     | GGAATTCCATATGCCGGAT<br>CCTCAACCCCCC                 | GGAATTCCTACCAGATCC<br>GATCATACTGAGCG   |

**Supplementary Table 4. Constructs and primer sequences used in this study (continued).**

|                              |            |                                                   |                                         |
|------------------------------|------------|---------------------------------------------------|-----------------------------------------|
| MH05t027<br>4800<br>promoter | FL         | GGAATTCCATATGCCGCC<br>TCTCGCTAGATCCAGA            | CCCAAGCTTATAAGCAA<br>TCTATGACACCACTACAG |
|                              | Δ500       | GGAATTCCATATGACTGAG<br>AACGCTCTCGGTTTAGAT         | CCCAAGCTTATAAGCAA<br>TCTATGACACCACTACAG |
|                              | ΔK4me3     | GGAATTCCATATGACTGAG<br>AACGCTCTCGGTTTAGAT         | CCCAAGCTTCTTGTTGGA<br>TTGCAGCTAGGGCC    |
|                              | FAIREK4me3 | GGAATTCCATATGACTGAG<br>AACGCTCTCGGTTTAGAT         | CCCAAGCTTATAAGCAA<br>TCTATGACACCACTACAG |
|                              | ΔFAIRE     | GGAATTCCATATGCCCCAG<br>GTCCTTTTCTCATCAC           | CCCAAGCTTATAAGCAA<br>TCTATGACACCACTACAG |
| MH08t035<br>5400<br>promoter | FL         | GGAATTCCATATGTGGCCT<br>AAAGCAGATTCTAGTATTA<br>AAC | CCCAAGCTTAAAGAGTCC<br>ATCAGTAATAAGCCCA  |
|                              | Δ500       | GGAATTCCATATGTTAATC<br>TCAAAACATGATGCTCAGG        | CCCAAGCTTAAAGAGTCC<br>ATCAGTAATAAGCCCA  |
|                              | ΔK4me3     | GGAATTCCATATGTTAATC<br>TCAAAACATGATGCTCAGG        | CCCAAGCTTCGAGACGAG<br>ACAAGAGGAGGAAC    |
|                              | FAIREK4me3 | GGAATTCCATATGAATATT<br>GTAAAGGTTTATTTTGGTT<br>ACA | CCCAAGCTTAAAGAGTCC<br>ATCAGTAATAAGCCCA  |
|                              | ΔFAIRE     | GGAATTCCATATGGAAGA<br>AGTGTGCGTACTACTGCGT         | CCCAAGCTTAAAGAGTCC<br>ATCAGTAATAAGCCCA  |

**Supplementary Table 5. Primer sequences used for enhancer validation in this study.**

|                        | Target                 | Construct                                                          |                                                                    | qRT-PCR                               |                               |
|------------------------|------------------------|--------------------------------------------------------------------|--------------------------------------------------------------------|---------------------------------------|-------------------------------|
|                        |                        | Forward primer                                                     | Reverse primer                                                     | Forward primer                        | Reverse primer                |
| Enhancer-like promoter | 1:<br>MH11g04922<br>00 | ACACTCTTT<br>CCCTACACG<br>ACGGCACAC<br>GACACGAGC<br>ACGAA          | GACTGGAG<br>TTCAGACG<br>TGTGCTCT<br>CTCTACCT<br>CTTCTTGA<br>GCCTAA | GTACAAC<br>ACTCTTT<br>CCCTACA<br>CGAC | GAGGAAGT<br>GGACTGCG<br>AGTT  |
|                        | 2:<br>MH02g01670<br>00 | ACACTCTTT<br>CCCTACACG<br>ACGCCAATC<br>TAAGAACAA<br>GAAGAGATC<br>C | GACTGGAG<br>TTCAGACG<br>TGTGCTTT<br>TTCGCACT<br>GTCATATT<br>GAATAC | GTACAAC<br>ACTCTTT<br>CCCTACA<br>CGAC | GCTAGCGG<br>ATTTCTTAG<br>GTGC |
|                        | 3:<br>MH06g05865<br>00 | ACACTCTTT<br>CCCTACACG<br>ACGGAGGA<br>ATAGTGGTA<br>CTCTCTCTG<br>TC | GACTGGAG<br>TTCAGACG<br>TGTGCCGT<br>AACAATGT<br>GTCAATGT<br>CTGC   | GTACAAC<br>ACTCTTT<br>CCCTACA<br>CGAC | ACAGCTTCT<br>CGTTGGGT<br>GAT  |
|                        | 4:<br>MH09g03783<br>00 | ACACTCTTT<br>CCCTACACG<br>ACGTATGTG<br>GAAAAGTTT<br>GTACTAACG      | GACTGGAG<br>TTCAGACG<br>TGTGCCAC<br>TTGATCCC<br>CAGGAAGT<br>AGG    | GTACAAC<br>ACTCTTT<br>CCCTACA<br>CGAC | TCAGCTGTC<br>TCCTCCGAT<br>CT  |
|                        | 5:<br>MH09g04315<br>00 | ACACTCTTT<br>CCCTACACG<br>ACGCTTTTG<br>GCTAGTTCT<br>ATAAACAGG      | GACTGGAG<br>TTCAGACG<br>TGTGCTTT<br>GCGGTCAA<br>GAACTAAA<br>GATTA  | GTACAAC<br>ACTCTTT<br>CCCTACA<br>CGAC | AGGGACGA<br>AGGGAGTA<br>AGAGA |

**Supplementary Table 5. Primer sequences used for enhancer validation in this study (continued).**

|                 |                                   |                                                                    |                                                                      |                                       |                                |
|-----------------|-----------------------------------|--------------------------------------------------------------------|----------------------------------------------------------------------|---------------------------------------|--------------------------------|
| Distal enhancer | 1:<br>chr12:101889<br>-102650     | ACACTCTTT<br>CCCTACACG<br>ACGATTCTT<br>GCATTTCCC<br>ATATTCATA<br>T | GACTGGAG<br>TTCAGACG<br>TGTGCATA<br>ATTCTTAG<br>TATTGTTA<br>CCTGCC   | GTACAAC<br>ACTCTTT<br>CCCTACA<br>CGAC | TGCATTTGG<br>CCCTAGCTA<br>CC   |
|                 | 2:<br>chr3:1151199<br>7-11512850  | ACACTCTTT<br>CCCTACACG<br>ACGACTAAA<br>CACAGCCTA<br>ATACACTCG<br>T | GACTGGAG<br>TTCAGACG<br>TGTGCATC<br>CGAACTGG<br>TCTTTGCG<br>TAG      | GTACAAC<br>ACTCTTT<br>CCCTACA<br>CGAC | CTTTGACCC<br>CTCGGCATC<br>TT   |
|                 | 3:<br>chr10:161860<br>41-16186708 | ACACTCTTT<br>CCCTACACG<br>ACGAAAATA<br>CATAGACCT<br>TGACATCAC<br>G | GACTGGAG<br>TTCAGACG<br>TGTGCACT<br>CCAAGACG<br>CAGTGTGT<br>ATGAC    | GTACAAC<br>ACTCTTT<br>CCCTACA<br>CGAC | ACGATTGT<br>ACGTGGCT<br>ATCTCG |
|                 | 4:<br>chr1:2162786<br>4-21628585  | ACACTCTTT<br>CCCTACACG<br>ACGTGTAGC<br>AAACCATGG<br>AACCACC        | GACTGGAG<br>TTCAGACG<br>TGTGCGAA<br>CTCAGCCT<br>TAATCTTG<br>CCTGT    | GTACAAC<br>ACTCTTT<br>CCCTACA<br>CGAC | GATCCAAC<br>CGGACAAG<br>TGCT   |
|                 | 5:<br>chr7:2256168<br>8-22562357  | ACACTCTTT<br>CCCTACACG<br>ACGGAATA<br>AACACGGTG<br>CAACCAT         | GACTGGAG<br>TTCAGACG<br>TGTGCAAT<br>AGAACAAA<br>TTAAACTG<br>AAAATAGC | GTACAAC<br>ACTCTTT<br>CCCTACA<br>CGAC | CGCTTGTCT<br>TTTAGCCGG<br>GA   |
| Control         | chr2:2841215<br>1-28413151        | ACACTCTTT<br>CCCTACACG<br>ACGTGCATA<br>GGCACAACC<br>ATCCC          | GACTGGAG<br>TTCAGACG<br>TGTGCAGG<br>ACCGGTTT<br>ACGAGTTT<br>C        | GTACAAC<br>ACTCTTT<br>CCCTACA<br>CGAC | CGGTTATG<br>GGCGGGTC<br>TAAC   |
